[Research article]

[Santos et al., 2019]

1 **Virulence potential of a multidrug-resistant *Escherichia coli* belonging to the**  
2 **emerging clonal group ST101-B1 isolated from bloodstream infection**

3

4 Virulence of a multidrug-resistant *Escherichia coli* ST101 causing bloodstream  
5 infection

6

7 Ana Carolina de Mello Santos<sup>1\*</sup>, Rosa Maria Silva<sup>1</sup>, Tiago Barcelos Valiatti<sup>1</sup>, Fernanda  
8 Fernandes dos Santos<sup>1</sup>, Rodrigo Cayô<sup>1,2</sup>, Ana Paula Streling<sup>3</sup>, Carolina Silva Nodari<sup>3</sup>,  
9 Ana Cristina Gales<sup>3</sup>, Milton Yutaka Nishiyama-Junior<sup>4</sup>, Eneas Carvalho<sup>5</sup>, Tânia  
10 Aparecida Tardelli Gomes<sup>1</sup>.

11

12 <sup>1</sup> Universidade Federal de São Paulo - Escola Paulista de Medicina (UNIFESP-EPM),  
13 Disciplina de Microbiologia, Departamento de Microbiologia, Imunologia e Parasitologia  
14 - DMIP, São Paulo - SP, Brazil.

15 <sup>2</sup> Universidade Federal de São Paulo - UNIFESP, Laboratório de Imunologia e  
16 Bacteriologia - LIB, Setor de Biologia Molecular, Microbiologia e Imunologia,  
17 Departamento de Ciências Biológicas - CDB, Instituto de Ciências Ambientais, Químicas  
18 e Farmacêuticas - ICAQF, Diadema - SP, Brazil.

19 <sup>3</sup> Universidade Federal de São Paulo - UNIFESP, Laboratório Alerta, Disciplina de  
20 Infectologia, Departamento de Medicina, Escola Paulista de Medicina - EPM, São Paulo  
21 - SP, Brazil.

22 <sup>4</sup> Laboratório Especial de Toxinologia Aplicada – Instituto Butantan, São Paulo – SP,  
23 Brazil.

24 <sup>5</sup> Laboratório de Bacteriologia - Instituto Butantan, São Paulo - SP, Brazil.

25

26 \*corresponding author: [carolina.mello@unifesp.br](mailto:carolina.mello@unifesp.br)(ACMS)

[Research article]

[Santos et al., 2019]

## 27 **Abstract**

28 *Escherichia coli* EC121 is a multidrug-resistant (MDR) strain isolated from bloodstream  
29 infection of an inpatient with persistent gastroenteritis and Zone T lymphoma that died  
30 due to septic shock. Despite causing an extraintestinal infection, strain EC121 harbors  
31 very few known virulence factors associated with extraintestinal pathogenic *E. coli*  
32 (ExPEC). Furthermore, this strain was assigned to phylogenetic group B1, which is  
33 usually related to commensals or diarrheagenic *E. coli* (DEC) strains, being rarely linked  
34 to extraintestinal infections. The question rises if *E. coli* EC121 is opportunistic or does  
35 have a true virulence potential. To address this question the genome of strain EC121 was  
36 sequenced, and an *in vitro* characterization of some pathogenic-associated properties was  
37 performed. The data retrieved from genome analyses showed that *E. coli* strain EC121  
38 belongs to the O154:H25 serotype, and to the sequence type 101-B1 (ST101-B1), which  
39 has been epidemiologically linked to extraintestinal infections and antimicrobial  
40 resistance spread as well. Moreover, it is shown to be closely related to Shiga-toxin  
41 producing *E. coli* (STEC). Besides, strain EC121 is an MDR strain harboring 14  
42 antimicrobial resistance genes, including *bla*<sub>CTX-M-2</sub>, and more than 50 complete virulence  
43 genetic clusters, which are reported to be associated either with DEC or ExPEC, or both.  
44 Strain EC121 also displays the capacity to adhere to and invade HeLa cells, intestinal  
45 Caco-2 cells and bladder T24 cells, as well as the ability to form biofilms on abiotic  
46 surfaces, and survive the bactericidal serum complement activity. Altogether, the genetic  
47 and phenotypic traits presented by *E. coli* EC121 may be unveiling a pathogen powered  
48 by its multi-drug resistance characteristic. The recognition of such MDR pathogens  
49 makes it essential to carry out studies providing accurate information about their virulence  
50 potential. Such studies will help in the development of alternative therapies of infection  
51 management and spread control of MDR strains.

[Research article]

[Santos et al., 2019]

52

53 **Keywords:** Extraintestinal, intestinal, pathogen, *Escherichia coli*, Multidrug resistance,  
54 hybrid pathogen, bloodstream infection, ExPEC, DEC, MDR, genome, virulence, ST101

55

## 56 **Author summary**

57 Extraintestinal pathogenic *Escherichia coli* are mostly associated with phylogenetic  
58 group B2 and the majority of the studies regarding extraintestinal infection focus on the  
59 most virulent strains, which might also possess multidrug-resistant phenotype, like the  
60 ST131 strains. On the other hand, strains that belong to phylogroup B1 and are isolated  
61 from extraintestinal infections are almost neglected, being considered as merely  
62 opportunist pathogens, and the majority of studies reporting strains from this phylogroup  
63 focus on antimicrobial resistance. We concentrated our research on one multidrug-  
64 resistant strain isolated from bloodstream infection that belongs to phylogenetic group B1  
65 to enlarge the knowledge about the virulence of this kind of strain. We demonstrated that  
66 strain EC121 has full potential to be considered a pathogenic strain, because it adheres to  
67 and invades intestinal and bladder human cells and survives in human serum; moreover,  
68 our data highlight some important EC121 features, which are typical of ST101 strains,  
69 like its involvement in the spread of antimicrobial resistance genes, its relationship with  
70 extraintestinal infections from diverse sources, and its close relatedness to Shiga toxin-  
71 producing *E. coli*. All these data are important for the development of global actions  
72 concerning the spread of antimicrobial resistance, as well as to elucidate the virulence  
73 potential of strains that at first glance may be considered as a mere opportunist.

## 74 **Introduction**

75 *Escherichia coli* is one of the most frequent pathogens isolated from bloodstream  
76 infections (BSI) around the world [1–5]. Despite all knowledge of extraintestinal  
77 infections due to pathogenic *E. coli*, the number of severe infections and outbreaks caused  
78 by these pathogens is rising [2,6]. Moreover, many of these infections are caused by  
79 multidrug-resistant (MDR) strains, leading to higher burden of disease [7–10].

80 The term extraintestinal pathogenic *Escherichia coli* (ExPEC) is used to define  
81 strains recovered from any extraintestinal infection in humans or animals. Although many  
82 virulence factors are associated with the pathogenicity of this group, it is difficult to  
83 identify or classify ExPEC strains based on a specific group of virulence genes [11]. Some  
84 studies developed molecular virulence patterns that define strains that harbor intrinsic  
85 extraintestinal virulence potential [12] or are potentially capable of causing urinary tract  
86 infection [13]. These molecular patterns are useful tools to track ExPEC both in the  
87 gastrointestinal tract or environment (soil, water, food), enabling the search for ExPEC  
88 reservoirs.

89 Even though such methods may recognize the most virulent strains, they fail in  
90 identifying a considerable part of isolates recovered from clinical samples [13,14]. The  
91 reason is that infections take place as a result of an imbalance between the virulence  
92 potential of the pathogen and the immune defenses of the host what makes it sometimes  
93 unclear whether the infection is being caused by a true pathogen or by an opportunistic  
94 strain. Considering this, the use of epidemiologic data and multi-locus sequence typing  
95 (MLST) for the identification of strains belonging to major pathogenic clonal groups  
96 could help in the determination of the potential pathogenic role played by an *E. coli* strain  
97 [15–17].

[Research article]

[Santos et al., 2019]

98           The emergence of MDR *E. coli* strains calls attention to the spread of clones  
99 carrying virulence along with resistance-encoding genes, making the control of these  
100 pathogens potentially difficult [2,18–22]. In this context, ST131 is the MDR high-risk  
101 clonal group widely disseminated and studied worldwide nowadays. Other clonal groups,  
102 presenting MDR phenotype, like ST405, ST38, and ST648, have also emerged and are  
103 already considered as of global risk [23]. On the other hand, some STs presenting MDR  
104 phenotype, although being isolated around the world, have not their pathogenic potential  
105 determined yet.

106           The spread of MDR pathogens is a major Public Health concern that needs to be  
107 adequately addressed towards efficient control. Based on that, the World Health  
108 Organization (WHO) called attention to this problem and the need for alternative  
109 therapeutic options for treatment of MDR infections. The development of vaccines and  
110 anti-virulence compounds could be alternative approaches to combat MDR strains,  
111 especially those showing pan drug resistance (PDR) phenotype [24]. However, for these  
112 alternatives to be effective, advanced knowledge is necessary, since not all pathogenic  
113 strains share the same virulence factors, and the use of the most prevalent virulence  
114 factors as targets can be problematic as they can adversely affect the gut microbiota.

115           It is well accepted that the phylogenetic grouping of *E. coli* keeps a very good  
116 correlation with the virulence potential of bacterial isolates. More recent epidemiological  
117 data have shown that non-virulent strains are mostly classified in the phylogenetic groups  
118 A, while diarrheagenic *E. coli* (DEC) are B1, and ExPEC are mainly B2. However, the  
119 fact that most *E. coli* virulence factors are carried on mobile genetic elements (e.g.  
120 plasmids and pathogenicity islands) may eventually cross these phylogenetic boundaries  
121 and promote the appearance of potential pathogens in atypical phylogroups.

[Research article]

[Santos et al., 2019]

122            Thus, a global analysis of virulence and resistance characteristics of ExPEC  
123 isolates, especially those escaping typical classification, is essential for the understanding  
124 of the infections they cause as well as for devising therapeutic alternatives to cope with  
125 MDR *E. coli* strains.

126            Aiming to provide information about the virulence determinants in non-typical  
127 ExPEC strains, we performed an extensive genotypic and phenotypic characterization of  
128 the MDR *E. coli* EC121 strain, which was characterized as belonging to phylogenetic  
129 group B1 and carrying only a few known virulence factors.

## 130 **Results**

### 131 **Genetic characterization and *in silico* analysis.**

132 The EC121 genome sequence generated 143 contigs. PlasFlow algorithm  
133 identified that 66 of those were contained in plasmids while 43 were chromosomal. The  
134 predicted genome size was 5,119,556 bp, with 50.34 % of GC content. It was composed  
135 by one chromosome and four plasmids that, together, would comprise at least 426,419 bp

136

### 137 **EC121 belongs to serotype O154:H25, ST101-B1, and is related to diarrheagenic *E.***

138 *coli*. The MLST analyses showed that the EC121 strain belonged to the ST101/ST88,  
139 according to the Warwick and Pasteur MLST schemes, respectively. The determination  
140 of O antigen type by sequencing analysis was inconclusive, because two possible O types,  
141 O154 and O100, could be assigned. Using specific serum agglutination assays it was  
142 determined that strain EC121 expressed the O154 antigen. Together with the *in silico*  
143 analysis of the *fliC* gene, which identified the H25 type flagella, EC121 was characterized  
144 as belonging to serotype O154:H25. Moreover, group IV capsule encoding genes were  
145 identified on its genome.

146 A phylogenetic tree built using reference *E. coli* strains from all pathotypes  
147 showed that EC121 was related to diarrheagenic *E. coli* (DEC) strains, since it was  
148 positioned in a clade closely associated with Shiga toxin-producing *E. coli* (STEC) (Fig  
149 1).

150 A second phylogenetic tree was built with 93 strains available at the NCBI, which  
151 belonged to the ST101 complex and were recovered from distinct sources (Fig 2, Table  
152 S1). Analysis of the tree showed that the majority of the strains of this ST are MDR, many  
153 of them carrying *mcr-1* (mobile colistin resistance gene), a variety of  $\beta$ -lactamases  
154 (*bla*<sub>CTX-M</sub>-like, *bla*<sub>OXA</sub>-like, *bla*<sub>NDM</sub>-like) and genes related to fosfomycin resistance

[Research article]

[Santos et al., 2019]

155 (*fosA3*). Interestingly, these strains were isolated from food, environment, animals, and  
156 humans, as part of the microbiota or involved in both intestinal and extraintestinal  
157 infections. Among the strains isolated from human infections (Fig S1 and Table S1), most  
158 were diagnosed as extraintestinal pathogens (28 strains), while three were intestinal  
159 pathogens; among the latter, one was Shiga toxin-producing *E. coli* (STEC), and one was  
160 enterotoxigenic *E. coli* (ETEC). Regarding the isolates from food and animals, seven  
161 strains were identified as STEC (Fig 2, Fig S1 and Table S1). Showing that ST101 is  
162 associated with intestinal and extraintestinal infection and it is clonal group associated  
163 with MDR phenotype

164

165 **EC121 harbors genes involved in virulence and stress response.** The EC121 genome  
166 annotation showed that strain EC121 contained 5,175 coding sequences (CDS), 82 tRNA,  
167 and 13 rRNA. One CRISPR *locus* was identified as type 1-IE and presented two arrays  
168 and 30 CRISPR-repeat regions (Fig 2A). Among the CDSs annotated, 702 corresponded  
169 to putative proteins designated as hypothetical proteins, and 4,473 CDS to putative  
170 proteins with functional assignments. Of interest, 221 genes were reported as belonging  
171 to systems involved in response to stress, virulence, and defense (Table 1 and Figs 2B-  
172 C).



[Research article]

[Santos et al., 2019]

173 **Table 1** - EC121 annotation overview.<sup>a</sup>

| Protein features                                   | Occurrence |
|----------------------------------------------------|------------|
| Hypothetical proteins                              | 702        |
| Proteins with functional assignments               | 4,473      |
| Proteins with E.C. <sup>b</sup> number assignments | 1,300      |
| Proteins with G.O. <sup>b</sup> assignments        | 1,076      |
| Proteins with Pathway assignments                  | 911        |
| Proteins with PLfam <sup>b</sup> assignments       | 5,063      |
| Proteins with PGfam <sup>b</sup> assignments       | 5,064      |

174 *a.* Results obtained using PATRIC annotation service;

175 *b.* Abbreviations: E.C. number - Enzyme commission universal G.O. - Gene Ontology  
176 Consortium; PLfam- PATRIC genus-specific family; PGfam- PATRIC cross-genus  
177 family.

178

179 Analysis using the MacSyFinder tool identified 10 type V secretion system  
180 proteins, nine of which were from type T5aSS and one from T5cSS (EhaG) (Table S2).  
181 One type III secretion system similar to *Salmonella* T3SS, and an incomplete type VI  
182 secretion system that carried only *tssB*, *tssD*, *tssE*, *tssH*, and *tssI* genes were also present  
183 (Table S2).

184 All genes that were reported by the PATRIC virulence factor database were  
185 manually curated to provide information about their full sequence. As shown in Table 2  
186 and Table S3 and S4, the genome of the EC121 strain encodes multiple adhesins, invasins,  
187 iron uptake systems, and genes involved with evasion of the host immune system. By the  
188 position of strain EC121 in the pathotype phylogenetic tree, some of these virulence  
189 factors are related to the pathogenesis of DEC, specifically of STEC and ETEC (Tables

[Research article]

[Santos et al., 2019]

190 2 and S3). Other virulence factors found were related to *Salmonella* spp. (PagN adhesin  
191 and systems associated with immune evasion and macrophage survival) and *Shigella* spp.  
192 (genes associated with intracellular survival and spread). Moreover, many accessory  
193 genetic clusters associated with the bacterial ability to cause extraintestinal infections,  
194 i.e., genes involved with biofilm formation, adherence to extraintestinal cells, iron  
195 acquisition and immune evasion were also detected in the EC121 genome. Furthermore,  
196 other clusters associated with Urinary Tract Infections (UTI) were detected (Tables 2 and  
197 S3).

198

199

200

Table 2 – Complete virulence factors identified

| Virulence traits                 | Associated with virulence in |                                                          |                                                                  |                                    |
|----------------------------------|------------------------------|----------------------------------------------------------|------------------------------------------------------------------|------------------------------------|
|                                  | Other Genera                 | DEC                                                      | ExPEC                                                            | Various                            |
| <b>Colonization and invasion</b> | MlaA, MsbB, Sfm, MisL, IcsP  | Lpf-1 <sub>O26</sub> , EhaG, Hcp, Elf, EhaA, EhaB, CFA-I | FdeC, Pix, Ygi, Yad, Yeh, Yra, Yfc, YchO, IbeB, IbeC, EptC, OmpA | Type 1 Fimbriae (H190), Ecp, Curli |
| <b>Immune evasion</b>            | SodB, TrxA, SirA, FpkA       |                                                          | Iss, OmpTp <sup>a</sup> , OmpTc <sup>a</sup> , Mig-14, HlyF      | RelA                               |
| <b>Iron acquisition</b>          |                              |                                                          |                                                                  | Sit, Iro, Fhu, Enterobactin        |
| <b>Regulators</b>                | DsbA, DegP, SlyA, CpxAR      | EvgAS                                                    | DsbAB, PhoPQ                                                     | QseBC, RcsAB                       |
| <b>Toxins and Bacteriocin</b>    |                              |                                                          | Microcin V, Colicin B, Colicin M                                 | ClyA, Hly III                      |
| <b>Non-LEE effectors</b>         |                              | EspL1, EspL4, EspX1, EspX4, EspX5, EspR1                 |                                                                  |                                    |

201

<sup>a</sup> OmpTc for chromosomal variant of OmpT protein, and OmpTp for plasmid variant of OmpT protein.

202

203

204

205

206

[Research article]

[Santos et al., 2019]

207 **No complete phage sequences were detected in the EC121 strain.** The search for phage  
208 sequences in strain EC121 identified 12 regions containing genes from a variety of  
209 different phages, ranging from 6 to 31 kb (Table 3, Table S4). Although the database  
210 considered a predicted phage sequence in region 6 as intact, based on their score criteria,  
211 it's size (14,400 bp) was not compatible with the size of the predicted "*Salmonella* phage  
212 Fels-2", whose complete genome sequence deposited in NCBI database is 33,693 bp.  
213 Remarkably, parts of the cytolethal distending toxin (Cdt-I and Cdt-V), and Shiga-like  
214 toxin (Stx1a and Stx2c) converting phages, as well as of *Shigella* serotype-converting  
215 phages Sfl, SflI, and SfV were detected among these regions (Table 3 and Table S4).

[Research article]

[Santos et al., 2019]

216

**Table 3 - Predicted phages detected in the EC121 genome.**

| Region | Length  | Completeness | Most Common Phage/accession number                    | GC %  |
|--------|---------|--------------|-------------------------------------------------------|-------|
| 1      | 6.3 kb  | incomplete   | <i>Bacillus</i> phage G/NC_023719                     | 51.27 |
| 2      | 30.9 kb | incomplete   | <i>Salmonella</i> phage 118970_sal3/NC_031940         | 49.82 |
| 3      | 14.2 kb | questionable | Enterobacteria phage P88/NC_026014                    | 49.75 |
| 4      | 20 kb   | incomplete   | <i>Shigella</i> phage POCJ13/NC_025434                | 47.95 |
| 5      | 28.5 kb | incomplete   | <i>Shigella</i> phage SfII/NC_021857                  | 45.37 |
| 6      | 14.4 kb | intact       | Enterobacteria phage Fels-2/NC_010463                 | 49.56 |
| 7      | 9.4 kb  | incomplete   | <i>Bacillus</i> phage Shanette/NC_028983              | 49.50 |
| 8      | 7.5 kb  | incomplete   | Enterobacteria phage phi92/NC_023693                  | 44.44 |
| 9      | 10.2 kb | questionable | Enterobacteria phage P2/NC_001895                     | 55.39 |
| 10     | 3.8 kb  | incomplete   | Bacteriophage WPhi/NC_005056                          | 50.16 |
| 11     | 8.4 kb  | questionable | Phage cdtI/NC_009514                                  | 46.05 |
| 12     | 6.7 kb  | incomplete   | <i>Shewanella</i> sp. phage <sup>1/4</sup> /NC_025436 | 47.92 |

217 a. Phage completeness was determined by scores obtained in the search algorithm  
 218 (PHASTER) based on the number of the phage's specific CDSs detected in the analyzed  
 219 region.

220

221 **EC121 has multiple resistance genes, and several efflux-pumps compatible with its**  
 222 **antimicrobial susceptibility profile.** The software ResFinder identified 15 resistance  
 223 genes in strain EC121, which are involved in reduced susceptibility to aminoglycosides,  
 224  $\beta$ -lactams, macrolides, phenicols, sulphonamides, trimethoprim, and tetracyclines (Table  
 225 4). Mutations in *parE*, *parC*, and in *gyrA* genes, which confer resistance to  
 226 fluoroquinolones, were also observed in the EC121 genome. Additionally, several efflux-  
 227 pumps related to resistance to heavy metals (copper and mercury), arsenic, disinfectants

[Research article]

[Santos et al., 2019]

228 (QacE), and antimicrobials (AcrAB-TolC, AcrAD-TolC, AcrEF-TolC, AcrZ, EmrAB-  
 229 TolC, EmrD, EmrKY-TolC, MacA, MacB, MdfA/Cmr, MdtABC-TolC, MdtEF-TolC,  
 230 MdtL, MdtM, and SugE) were also detected. The MDR phenotype profile of strain EC121  
 231 assessed by the microdilution method was consistent with the genomic findings (Table  
 232 4).

233

234 **Table 4** -Antimicrobial resistance genotype and phenotype observed in strain EC121.

| Antimicrobial Class     | Genotype                                                                                                                       | Phenotype                         |                               |
|-------------------------|--------------------------------------------------------------------------------------------------------------------------------|-----------------------------------|-------------------------------|
|                         |                                                                                                                                | Antimicrobial agent               | MIC <sup>b</sup> (µg/mL)      |
| <b>Aminoglycosides</b>  | <i>aph(3'')</i> -Ib, <i>aph(6)</i> -Id,<br><i>aph(4)</i> -Ia, <i>aac(3)</i> -Iva                                               | Amikacin                          | 2                             |
|                         |                                                                                                                                | Gentamicin                        | <b>32</b>                     |
|                         |                                                                                                                                | Ampicillin                        | ≥ <b>256</b>                  |
|                         |                                                                                                                                | Ceftazidime                       | <b>64</b>                     |
|                         |                                                                                                                                | Ceftriaxone                       | ≥ <b>512</b>                  |
|                         |                                                                                                                                | Cefepime                          | <b>16</b>                     |
| <b>β-lactams</b>        | <i>bla</i> <sub>TEM-1B</sub> ,<br><i>bla</i> <sub>CTX-M-2</sub>                                                                | Piperacillin/Tazobactam           | > <b>256/4</b>                |
|                         |                                                                                                                                | Meropenem                         | ≤0.5                          |
|                         |                                                                                                                                | Ertapenem                         | ≤0.5                          |
|                         |                                                                                                                                | Imipenem                          | ≤0.5                          |
|                         |                                                                                                                                | Aztreonam                         | > <b>32</b>                   |
|                         |                                                                                                                                | Trimethoprim/<br>Sulfamethoxazole | > <b>128/</b><br><b>2,432</b> |
| <b>Phenicol</b>         | <i>catA1</i>                                                                                                                   | Chloramphenicol                   | > <b>64</b>                   |
|                         |                                                                                                                                | Minocycline                       | <b>16</b>                     |
| <b>Tetracyclines</b>    | <i>tet(A)</i>                                                                                                                  | Tigecycline                       | 1                             |
| <b>Fluoroquinolones</b> | <i>parE</i> (S <sub>458</sub> A); <i>parC</i><br>(S <sub>80</sub> I); <i>gyrA</i> (S <sub>83</sub> L and<br>D <sub>87</sub> Y) | Ciprofloxacin                     | > <b>64</b>                   |
| <b>Polymyxins</b>       | -                                                                                                                              | Colistin                          | ≤0.25                         |
|                         |                                                                                                                                | Polymyxin B                       | ≤0.25                         |
| <b>Fosfomicin</b>       | -                                                                                                                              | Fosfomicin                        | NT                            |
| <b>Macrolides</b>       | <i>mph(A)</i> , <i>mdf(A)</i>                                                                                                  | Azithromycin                      | NT                            |

235 *a.* chromosomal mutations and mobile genes related to antimicrobial resistance identified;

236 *b.* Resistance is highlighted in bold, following EUCAST (2019) breakpoints.

237 NT, not tested.

238

[Research article]

[Santos et al., 2019]

239 **The EC121 strain harbors four circular plasmids.** Four plasmid bands were detected  
240 by agarose gel electrophoresis, three of which presented high molecular weight masses  
241 (approximately 67 kb, 110 kb, and 180 kb), and one was smaller than 6.9 kb (Fig 4).  
242 Seven different replicons were found in EC121 using PlasmidFinder 2.0 (IncHI2A,  
243 IncHI2, IncQ, IncFII, IncFIB, IncN, and IncL/M). This information was associated with  
244 PlasFlow and Blast analyses to manually determine plasmid sequences.

245 The pEC121.A, which was the largest plasmid detected by gel electrophoresis  
246 consists of a 189,202 bp plasmid carrying three basic replicons belonging to  
247 incompatibility groups IncHI2A, IncHI2. This plasmid shows high identity with the  
248 pYps.F1 plasmid from *Yersinia pseudotuberculosis* strain Yps.F1 (cover: 99%, e-value:  
249 0.0, identity: 99.77%) (Fig 4 and Fig S2). More important, plasmid pEC121.A carries the  
250 antimicrobial resistance genes *sul2*, *tet(A)*, *bla*<sub>TEM-1B</sub>, *aph-3'-Ib*, and *aph-6-Id* genes.

251 Plasmid pEC121.B was an IncFIB/IncFII plasmid with about 104,053 bp that is  
252 similar to pAPEC plasmids that carry virulence and resistance genes simultaneously (Fig  
253 S3). Such plasmid carries the beta-lactamase encoding gene *bla*<sub>CTX-M-2</sub>, mercury and  
254 copper resistance-encoding genes, and a class 1 integron, as well as the *iro*, *sit*, *tra*, and  
255 *hlyF mig-14* operons; and *ompT*. The resistance genes were inserted close to a Tn21  
256 transposon.

257 Plasmid pEC121.C is an IncL/M plasmid of 65,565 bp with high homology (100%  
258 of identity and coverage) to the pASM2 plasmid (accession n° NZ\_CP019841.1) of  
259 *Enterobacter roggenkampii* strain R11 (Fig S4). Finally, the smallest plasmid, pEC121.D,  
260 carries an IncN replicon and is 3,205 bp in size.

261

262 **Virulence phenotype.**

[Research article]

[Santos et al., 2019]

263 To evaluate the expression of the virulence-encoding genes detected, *in vitro*  
264 assays were performed to analyze the ability of the strain to: (i) resist to the bactericidal  
265 activity of the serum complement system; (ii) attach to abiotic surfaces and form biofilms;  
266 (iii) adhere to and invade eukaryotic cells.

267

268 **The EC121 strain was resistant to the bactericidal activity of the complement system**  
269 **and forms biofilm on abiotic surfaces.** To disseminate in the host, extraintestinal  
270 pathogenic bacteria must be able to survive the serum bactericidal activity. To identify  
271 such a feature in EC121, we determined the lowest serum-resistant bacterial inoculum  
272 using a pool of normal human sera (NHS). The lowest inoculum of EC121 strain that  
273 resisted serum activity after two hours was  $10^2$  CFU/mL, which was similar to the one  
274 obtained for the resistant control strain J96. *E. coli* strain C600, used as the susceptible  
275 control, barely resisted to 30 min-exposition period in the highest inoculum tested ( $10^8$   
276 CFU/mL). To validate if the bacterial survival was associated with the resistance to  
277 complement activity, assays were repeated with heat-inactivated serum. In this condition,  
278 all strains survived the challenge with similar inoculum (Table 5).

279



280 **Table 5** -Estimated bacterial inoculum resistant to serum activity (CFU/mL).<sup>a</sup>

| Challenge period | Strains         |                 |                 |                 |                 |                 |
|------------------|-----------------|-----------------|-----------------|-----------------|-----------------|-----------------|
|                  | J96             |                 | EC121           |                 | C600            |                 |
|                  | NHS             | inHS            | NHS             | inHS            | NHS             | inHS            |
| 30 min           | 10 <sup>1</sup> | 10 <sup>1</sup> | 10 <sup>2</sup> | 10 <sup>1</sup> | 10 <sup>8</sup> | 10 <sup>1</sup> |
| 1 h              | 10 <sup>2</sup> | 10 <sup>1</sup> | 10 <sup>2</sup> | 10 <sup>1</sup> | NG              | 10 <sup>1</sup> |
| 2 h              | 10 <sup>2</sup> | 10 <sup>1</sup> | 10 <sup>2</sup> | 10 <sup>1</sup> | NG              | 10 <sup>1</sup> |

281 *a.* Values represent the approximate relative mean of the lowest bacterial inoculum that  
282 remained viable after the challenge. All assays were performed in triplicate using 50%  
283 serum diluted in PBS (v/v);  
284 NHS - Normal human serum; inHS - inactivated human serum; NG - no growth after the  
285 challenge.

286

287 The ability to form biofilm can confer many advantages to any pathogen,  
288 including persistence in particular niches and tolerance against antimicrobials and the  
289 host immune system. The EC121 strain was able to adhere to and form biofilms on a glass  
290 surface when grown in Dulbecco's Modified Eagle Medium (DMEM), as shown in Fig  
291 5A. Although its adherence to the abiotic surface was not massive as the adherence  
292 presented by the positive control (EAEC 042 strain), it was significantly more intense  
293 than that of the negative control (HB101 strain), as shown by results obtained using the  
294 crystal violet absorption index (Fig 5B).

295

296 **The EC121 strain adheres to and invades eukaryotic cell lineages.** At first, we  
297 accessed the ability of strain EC121 to adhere to HeLa cells using a classic 3-h adherence  
298 assay, on which it was able to adhere to, both in the presence or absence of D-mannose,

[Research article]

[Santos et al., 2019]

299 which abolishes the adherence mediated by type-1 fimbriae. The presence of D-mannose  
300 reduced the adherence ability of strain EC121 in more than 90% (Fig 6), from  $2.1 \times 10^8$   
301 CFU/mL to  $1.4 \times 10^7$  CFU/mL. However, in such condition, the mean adherence index in  
302 the presence of D-mannose was similar to the diffusely adherent *E coli* C1845 strain  
303 ( $1.4 \times 10^7$  CFU/mL), used as a positive control (Fig 6).

304 We also investigated whether the EC121 strain was able to invade HeLa cells. In  
305 a short-period invasion assay, the EC121 strain interacted with HeLa cells and invaded  
306 with higher efficiency than reference invasive control *Shigella flexneri* strain M90T.  
307 Indeed, the total number of internalized EC121 bacteria (mean of  $7.11 \times 10^4$  CFU/mL) was  
308 22-fold higher than the number of internalized M90T cells (Figs 7 and S5). On the other  
309 hand, the proportion of invasion/interaction of strain EC121, determined as the invasion  
310 index, was 2-fold lower than strain M90T (0.17% and 0.40%, respectively). The  
311 difference between the invasion indexes of M90T and EC121 might be due to the large  
312 difference in the adherence efficiency between them; the interaction of EC121 with HeLa  
313 cells was 50-fold higher than that of the M90T strain (Fig 7). Invasiveness in the presence  
314 of D-mannose also was assessed to evaluate whether the invasion ability of EC121 was  
315 dependent on type-1 fimbriae or another mannose-dependent adhesin. EC121 remained  
316 invasive in the presence of D-mannose but with reduced bacterial counts (Fig 7 and S5),  
317 thus showing that type-1 fimbriae contributed to both adherence and invasion of EC121,  
318 although it was not the only factor associated to these traits.

319 The capacity to interact (adhere to and invade) with differentiated intestinal Caco-  
320 2 cells and bladder T24 cells was also assessed. The EC121 strain also adhered to and  
321 invaded both cell lineages. Even though the adherence efficiency was similar, the  
322 invasion index was lower in Caco-2 cells than in HeLa cells (Fig 7 and S5). On the other  
323 hand, in T24 cells, these parameters were similar to those found in HeLa cells. A classic

[Research article]

[Santos et al., 2019]

324 qualitative adherence assay revealed that the EC121 strain interacted abundantly with all  
325 tested cell lines, avoiding the coverslip surface even in the absence of D-mannose (Fig  
326 S6).

327

## 328 **Discussion**

329 The *E. coli* EC121 strain was isolated in 2007 from a bloodstream infection of an  
330 inpatient that presented persistent gastroenteritis and T-zone lymphoma. Since initial  
331 analyses showed that it belonged to phylogenetic group B1 and carried few virulence  
332 markers commonly related to extraintestinal pathogenic *E. coli*, it was classified as  
333 ExPEC negative (ExPEC-) [25] and therefore considered as an opportunistic pathogen.  
334 However, considering that about 40% of extraintestinal infections are caused by strains  
335 devoid of virulence factors [13,14] and that EC121 was an MDR strain, its entire genome  
336 was sequenced to further understand its virulence potential.

337 Interestingly, the EC121 strain belongs to ST101, which has been previously  
338 reported to be involved in nosocomial outbreaks caused by Metallo- $\beta$ -lactamases-  
339 producing strains in many countries from Europe, Asia, and Oceania [26–30].  
340 Furthermore, ST101 has also been detected among strains of non-outbreak related  
341 extraintestinal infections [31–38], water [39], poultry infection [40], retail food [31,41–  
342 43], and healthy human and animal intestinal microbiota [38,44–47], mostly presenting  
343 an MDR phenotype. Shrestha et al. [48] drew attention to ST101 due to the PDR  
344 phenotype presented by some strains of this ST, and mainly because it is not considered  
345 a pandemic clone, although it has been isolated worldwide. We, therefore, analyzed data  
346 about the infection type, isolation source, and resistance genetic markers presented by the  
347 strains of the ST101 complex that were previously deposited in the NCBI (Table S1).  
348 Such analysis evidenced that MDR strains of this complex were spread worldwide. In

[Research article]

[Santos et al., 2019]

349 addition, such ST complex is related to Shiga toxin-producing strains as well as strains  
350 isolated from extraintestinal infections, human and animal microbiota, retail food, and  
351 environment. Moreover, many strains simultaneously carry the *bla*<sub>CTX-M-55</sub>, *mcr-I*, *fosA3*,  
352 and *qnrSI* genes. Interestingly, one strain present simultaneously *aac(6')-Ib-cr*, *bla*<sub>CTX-M-55</sub>,  
353 *bla*<sub>NDM-5</sub>, *bla*<sub>OXA-1</sub>, *mcr-I*, *fosA3*, and other 19 resistance genes.

354 Likewise, the EC121 strain showed multiple antimicrobial resistance genes,  
355 including genes that confer resistance to third-generation cephalosporins (*bla*<sub>CTX-M-2</sub>). It  
356 is worth to mention that the EC121 strain was isolated in 2007, and its MDR phenotype  
357 was relevant since at that period it was susceptible only to carbapenems, polymyxins, and  
358 amikacin. Recently, the *E. coli* strain ICBEC72H, which belongs to ST101 and carried  
359 only *bla*<sub>CTX-M-8</sub> and *mcr-I*[32] was isolated from a human extraintestinal infection in  
360 Brazil. Similarly, the ST101 *E. coli* strain 200H (Table S1) was isolated from a human  
361 urinary tract infection and carried *bla*<sub>OXA-9</sub>, *mcr-I*, and *aac(6')-Ib-cr*. These reports show  
362 that MDR strains belonging to the ST101 complex have been circulating in Brazil for a  
363 long time.

364 Some authors showed that the *E. coli* strain 912 (ST101) was selected by the usage  
365 of antimicrobial agents in animals and that it was able to colonize human and pig gut and  
366 spread through the environment, reaching and colonizing animals that were not under  
367 antimicrobial treatment [49,50]. These same authors have also shown that ST101 strains  
368 can naturally acquire and transfer plasmid-borne antimicrobial resistance genes in the gut  
369 [49,50]. Such a feature is important for various reasons. First, strain EC121 carried three  
370 large plasmids, two of which (pEC121.A and pEC121.B) harbored different antimicrobial  
371 resistance genes. Besides, *E. coli* strains belonging to ST101 were recovered from retail  
372 meat in Europe and Asia [42,43], and from extraintestinal infections in Brazil and USA  
373 in the same regions in which they were detected from retail meat [31,40].

[Research article]

[Santos et al., 2019]

374           Additionally, strains belonging to the ST101 complex carrying multiple resistance  
375 genes were recovered from the intestine of healthy humans and animals in many  
376 countries. Therefore, even if these strains do not cause infection directly, they could  
377 potentially transfer plasmids to other bacteria, even from distinct genera. Such cross  
378 genera plasmid transfer could be easily identified in the plasmids reported in the present  
379 study; pEC121.C, for example, is closely related to plasmids found in *Klebsiella* spp. and  
380 *Enterobacter* spp., while pEC121.A is related to *Salmonella* spp. and *Yersinia* spp.  
381 plasmids. Together, these findings reinforce the high risks associated with strains  
382 belonging to the ST101 complex due to their ability to colonize humans and animals' gut,  
383 to easily disseminate via retail food and water, being able to acquire and spread  
384 antimicrobial resistance-encoding genes.

385           Strains from the ST101 complex are included in the phylogenetic group B1, which  
386 implies that they do not have all the classical virulence factors that are usually associated  
387 with the most virulent ExPEC strains [51,52]. Many studies reported phylogroup B1 *E.*  
388 *coli* strains as commensals or as intestinal pathogens, but not as extraintestinal pathogens  
389 [51–53].

390           The genomic analysis of the EC121 strain showed a high number of virulence  
391 genes, demonstrating that it presents all the traits necessary to be considered as an  
392 extraintestinal pathogenic agent. Moreover, like other ExPEC strains, EC121 displayed  
393 multiple virulence genes related to each feature, reflecting the redundant phenotype that  
394 ensures its pathogenicity. However, even considering the completeness of each sequence  
395 and each operon, which was manually checked, the presence of virulence genes “per se”  
396 does not guarantee that all of them are expressed. Therefore, to evaluate the expression  
397 of such genes, distinct phenotypic assays were performed and confirmed the virulence  
398 genetic background of EC121.

[Research article]

[Santos et al., 2019]

399

400           To test the bacterial ability to resist the serum complement activity, a two hours  
401 challenge assay was performed, in which one particle can traverse all circulatory system  
402 at least twice, so a pathogen that resists complement's activity during this period, even  
403 with a small bacterial load, is, in theory, more capable of reaching different niches and  
404 spread through the bloodstream or cause a bloodstream infection. The EC121 strain  
405 resisted the NHS for two hours with an inoculum similar to the resistant *E. coli* J96 control  
406 strain, thus confirming the EC121 serum resistant phenotype. Serum complement is the  
407 first immunological barrier to control pathogens that reach the bloodstream. Complement  
408 resistance confers the possibility to spread to different body sites through the  
409 bloodstream. Hallström et al. [54] reported the relationship of bacterial resistance to NHS  
410 with sepsis severity, and other authors have associated it to different kinds of  
411 extraintestinal infections [55–57].

412           The ability to colonize and attach to surfaces is also an important trait for any  
413 pathogenic bacteria; in this way, the assays carried out showed not only that EC121 strain  
414 was able to adhere to and invade different cell lineages, including bladder T24 cells but  
415 that it could also attach and produce biofilm on abiotic surfaces. Peirano et al. [58] showed  
416 that ExPEC negative ST101 MDR strains isolated from extraintestinal infections could  
417 interact with HEp-2 and Caco-2 cells more efficiently than strains belonging to the  
418 epidemic clones ST131 and ST405, which are ExPEC positive [58]. Moreover, the  
419 capacity to produce biofilm could confer to EC121 strain protection against the  
420 immunological system and antibiotics, assisting its persistence and spread in the  
421 environment.

422           Interestingly, many of the EC121 virulence factors detected in the draft genome  
423 are related to diarrheagenic *E. coli*, even though none of them is implicated in DEC

[Research article]

[Santos et al., 2019]

424 pathotype definition. The presence of many genetic features related to Shiga-toxin  
425 producing *E. coli* (STEC) strains, e.g., Hcp, EhaG, and Lpf-1<sub>O26</sub>, as well as the proximity  
426 of EC121 to the clade that contains STEC strains and *E. coli* O104:H4 strain 2011C-3493,  
427 draws attention to its potential to cause diarrhea.

428 Many features identified in the EC121 genome reinforce its linkage with STEC  
429 strains. Phenotypically, EC121 expressed the O154:H25 serotype, but it possesses the  
430 group IV capsule-encoding genes. This kind of capsular group is known to be  
431 thermoresistant and expressed as K<sub>LPS</sub> or O-antigen capsule. This could explain the  
432 expression of the O154 instead of O100 antigen, despite of the presence of all genes  
433 related to the expression of the latter. Interestingly O100 is a STEC related serogroup.

434 Moreover, many of the phage remains detected in the EC121 strain were related  
435 to Stx-converting phages; besides, ST101 strains carrying the *stx<sub>1a</sub>* gene have been  
436 reported in food sources [41,59]. In humans, ST101 strains were already reported in a  
437 patient with Hemolytic Uremic Syndrome (HUSEC) [59–61] and in non-bloody diarrhea  
438 related to a Stx1a-producing *E. coli* strain [62]. Although only one of these strains had its  
439 genome sequenced, some ST101 *E. coli* strains recovered from animals and food were  
440 found to carry *stx1*. Interestingly, most Stx-converting phages remains found in EC121  
441 were similar to those commonly related to Stx1a production, corroborating with the  
442 results presented here. The genome of three non-STEC strains from diarrheic patients was  
443 found in GenBank, one of which was devoid of DEC virulence factors. Likewise, EC121  
444 was isolated from bloodstream infection of one inpatient with persistent infectious  
445 gastroenteritis which was probably the source of EC121 infection. Unfortunately, the *E.*  
446 *coli* isolated from stool was not stored not allowing further comparison between  
447 bloodstream and stool *E. coli* isolates.

[Research article]

[Santos et al., 2019]

448           In summary, our extensive *in silico* and *in vitro* analyses of virulence and  
449 resistance properties of *E. coli* strain EC121, an O154:H25 B1-ST101 strain isolated from  
450 a human bloodstream infection, confirmed its virulence potential in both intestinal and  
451 extraintestinal infections and increased the knowledge on the complex scenario of  
452 virulence traits present in the MDR *E. coli* ExPEC negative group, contributing to the  
453 potential development of strategies to control the spread of such pathogens.



[Research article]

[Santos et al., 2019]

## 454 **Material and Methods**

### 455 **Bacterial strain.**

456 The *E. coli* strain EC121 was isolated from the blood of a patient diagnosed with  
457 T-zone lymphoma and persistent infectious gastroenteritis, who had been hospitalized in  
458 a tertiary hospital located in the city of São Paulo, Brazil, in 2007. The patient died due  
459 to septic shock two days after isolation of the EC121. The EC121 strain was kept frozen  
460 in glycerol at -80°C in ENTEROBACTERIALES-EXTRAIESTINAL-EPM-DMIP  
461 collection n° A27A7C3. The initial virulence and resistance characterization showed that  
462 EC121 strain belonged to phylogroup B1, presented an MDR phenotype by routine  
463 susceptibility testing, and harbored few known virulence genes (*fim*, *hra*, *cvaC*, *ompA*,  
464 *ompT*, *sitA*, *iroN*). Furthermore, it was not considered a pathogenic strain because it  
465 harbored none of the virulence factors commonly involved in the characterization of  
466 ExPEC (presence of two of the following genes: *papA/C*, *sfaDE*, *afaBC*, *iuc/iut*, *kpsMTII*)  
467 [25].

468

### 469 **Total DNA extraction, whole-genome sequencing (WGS), and genome assembly.**

470 The total bacterial DNA extraction was done using Wizard® Genomic DNA  
471 Purification Kit (Promega - USA) following the manufacturer's protocol. The extracted  
472 DNA was sequenced in an Illumina® HiSeq1500 (Illumina-USA), using the Rapid  
473 protocol to obtain 2x250 paired-end reads, according to the manufacturer's  
474 recommendations. Raw data were processed with Trimmomatic, and then the paired-end  
475 reads were assembled using SPAdes (version 3.12.0), with default parameters, and careful  
476 mode on [63].

477

### 478 **Genomic analyses and annotation.**

[Research article]

[Santos et al., 2019]

479 The obtained draft genome was submitted to various online bioinformatics  
480 platforms of the Center of Genomic Epidemiology (CGE) pipeline to determine (i)  
481 sequence types [64] for both *E. coli* MLST schemes;(ii) serotype (SerotypeFinder  
482 2.0)[65];(iii) presence and types of plasmid replicons (PlasmidFinder 2.0) [66];(iv)  
483 presence of resistance genes (ResFinder 3.1)[67];and (v) STEC virulence factors  
484 (VirulenceFinder 2.0) [68]. PHASTER [69] and PHAST [70] were used to detect  
485 bacteriophage sequences in each contig of the draft genome.

486 The genome was annotated using Pathosystems Resource Integration Center  
487 (PATRIC) Comprehensive Genome Analysis service that uses RASTtk[71]. Each  
488 sequence that was assigned as a virulence factor in PATRIC's database was manually  
489 submitted to BLAST/NCBI [72] and UniProt [73] to validate the virulence factors, to get  
490 all information about the virulence genes detected, to evaluate the completeness of the  
491 sequence and to determine its homology in relation to the RefSeq protein in Swiss-Prot.  
492 PATRIC [71] service was also used to build a phylogenetic tree using RAxML-VI-HPC  
493 or Fast tree 2, where all representative *E. coli* genomes from different pathotypes were  
494 used to construct the tree, as well as the deposited genomes of *E. coli* strains belonging  
495 to ST101 complex from diverse sources. The tree was built based on the concatenated  
496 sequence of all shared proteins among all genomes using RAxML or FastTree2. To  
497 construct the phylogenetic tree of EC121 and representative *E. coli* pathotypes, two  
498 *Escherichia fergusonii* strains ATCC35469 and NCTC12128 were used as outgroups. To  
499 build ST101 complex phylogenetic trees, *E. fergusonii* strains ATCC35469, *E. coli* str  
500 IAI1, *E. coli* O157:H7 str Sakai, *E. coli* O104:H4 str 2011c-3493 were used as outgroup.  
501 All phylogenetic tree final layout and annotation were done using iTOL v.4 [74]. The  
502 annotated genome was submitted to MacSyFinder from Galaxy@Pasteur [75] to detect  
503 CAS-CRISPR sequence type and the presence of secretion systems [76,77].

[Research article]

[Santos et al., 2019]

504

505 **Serum agglutination assay for typing the O and H antigens.**

506 Serum agglutination assay was carried out following the standard methodology as  
507 described by Orskov and Orskov [78] for serotyping, using O serum against O100 and  
508 O154, and H serum against H25 provided by the Centers for Disease Control and  
509 Prevention (CDC, USA).

510

511 **Plasmid DNA extraction and analysis.**

512 Bacteria were cultivated in Tryptic soy broth (TSB - Difco, USA) at 37°C, in a  
513 static stove for approximately 18 h, and 1 ml of the culture was submitted to plasmid  
514 alkaline extraction protocol [79]. The *E. coli* strain 39R861 was used as a plasmid mass  
515 reference ladder and as control of extraction [80]. The plasmid extract was submitted to  
516 electrophoresis in an agarose gel (0.8%) in Tris-Borate-EDTA (TBE) buffer, stained with  
517 ethidium bromide solution (5 µg/mL), analyzed using Molecular Imager®Gel Doc™ XR<sup>+</sup>  
518 with Image Lab™ Software System from Bio-Rad (USA).

519

520 ***In silico* plasmid analysis.**

521 To accomplish the plasmid analysis, the following strategies were used. First, the  
522 draft genome was submitted to CGE to identify the contigs that contained replicons;  
523 subsequently, the assembled genome was analyzed by PlasFlow [81] to classify the  
524 possible source of each contig (as chromosomal or plasmid). The contigs containing  
525 replicons were analyzed using the Standard Nucleotide BLAST in NCBI, all the retrieves  
526 that had returned an e-value of 0.0 and with more than 90% of identity and coverage were  
527 BLASTed against EC121 draft genome to find the best complete sequenced plasmid  
528 related to those found in EC121. When the sum of the contigs identified was consistent

[Research article]

[Santos et al., 2019]

529 with plasmid predicted size determined in the agarose gels electrophoresis, the contigs  
530 were marked and signed as belonging to the same plasmid. In parallel, using Bowtie2  
531 version2.2.6, raw reads were mapped to the best complete plasmid that better matched  
532 with the EC121 draft to validate the analyses.

533

#### 534 **Data availability.**

535 The EC121 Whole Genome Shotgun project has been deposited at  
536 DDBJ/ENA/GenBank under the accession VYQD00000000. The version described in  
537 this paper is version VYQD01000000.

538

#### 539 **Determination of the lowest bacterial inoculum which was resistant to human serum** 540 **complement.**

541 To access the bacterial serum-resistance, the lowest bacterial inoculum resistant  
542 to serum was assessed. Lyophilized human complement serum (Sigma, USA) was  
543 reconstituted in sterile phosphate-buffered saline (PBS). The assay was performed in 96-  
544 wells plates, where complement serum was distributed in each well (90 uL per well).  
545 Bacteria were grown overnight at 37°C, serially diluted (1:10) in complement serum until  
546 10<sup>-10</sup> and incubated at 37°C. Aliquots of 10 µL of each well were seeded onto MacConkey  
547 agar plates after 30 min, 1 h and 2 h of incubation. Simultaneously, another assay was  
548 performed with previously heat-inactivated serum as control. The *E. coli* strains J96 and  
549 C600 were used as resistant and susceptible controls, respectively [82]. The lowest  
550 bacterial inoculum resistant to human complement was determined by the last bacterial  
551 dilution which had bacterial growth onto MacConkey after the challenge. For each assay,  
552 the initial bacterial inoculum was determined by diluting bacteria in PBS, plating in

[Research article]

[Santos et al., 2019]

553 MacConkey agar and CFU counting. The data was reported in CFU/mL. Biological  
554 assays were performed in triplicates.

555

556 **Antimicrobial susceptibility testing.**

557 The minimum inhibitory concentration (MIC) was determined using the broth  
558 microdilution method, following the European Committee on Antimicrobial  
559 Susceptibility Testing (EUCAST) recommendations and breakpoints [83]. The following  
560 antimicrobials (Sigma - USA) were tested: ampicillin, piperacillin/tazobactam,  
561 ceftriaxone, ceftazidime, cefepime, aztreonam, ertapenem, imipenem, meropenem,  
562 ciprofloxacin, amikacin, gentamicin, tigecycline, colistin, polymyxin B,  
563 trimethoprim/sulfamethoxazole, and chloramphenicol. *E. coli* ATCC 25922 and  
564 *Pseudomonas aeruginosa* ATCC 27853 were used as quality control strains.

565

566 **Biofilm formation on abiotic surfaces.**

567 Biofilm formation was evaluated on polystyrene and glass surfaces as described  
568 by Lima et al [84] in an 24 hours assay. Each assay was performed in biological and  
569 experimental triplicates. The *E. coli* strain EAEC 042 and laboratory *E. coli* strain HB101  
570 were used as positive and negative controls, respectively; in all assays, a non-inoculated  
571 well was used as control of dye retention.

572

573 **Cell culture and maintenance.**

574 HeLa (ATCC® CCL-2™), intestinal Caco-2 (ATCC® HTB-37™) and bladder T24  
575 (ATCC® HTB-4™) cell lineages were used to evaluate the ability of strain EC121 to  
576 interact with eukaryotic cells. HeLa and Caco-2 cells were cultured in DMEM, High  
577 Glucose, GlutaMax™ (Gibco- ThermoFisher Scientific, USA), supplemented with 10%

[Research article]

[Santos et al., 2019]

578 bovine fetal serum (BFS) (Gibco, USA), 1% non-essential amino acids (Gibco, USA),  
579 and 1x Penicillin-Streptomycin-Neomycin (PSN) antibiotic mixture (Gibco, USA), while  
580 T24 cells (ATCC HTB-4) were cultured in McCoy 5A (modified) media (Gibco, USA),  
581 supplemented with 10% of BFS and 1x PSN antibiotic mixture. All lineages were kept at  
582 37°C in an atmosphere of 5% CO<sub>2</sub>. For all assays, cell suspensions containing 10<sup>5</sup>  
583 cells/mL were seeded in 24-well plates, with or without glass coverslips for qualitative or  
584 quantitative assays, and cultured for 48 h (HeLa cells) or ten days (Caco-2 cells).

585

#### 586 **Adherence assay in HeLa, Caco-2, and T24 cells.**

587 Adherence, fixing, and staining procedures were performed as described by  
588 Garcia et al. [85]. All cell lineages were washed three times with PBS and 1 mL of proper  
589 media, supplemented with 2% BFS and 2% D-mannose, was added. The assay was also  
590 performed without D-mannose to assess the impact of abolishment of the mannose  
591 sensitive-adherence via Type 1-fimbria. To evaluate the efficiency of adherence to the  
592 cells, the assay was performed as described previously [85], except that after 3 h of  
593 incubation the epithelial cells were washed thrice with sterile PBS, lysed with 1 mL of  
594 sterile bi-distilled water for 1 h, collected, diluted and plated onto MacConkey agar for  
595 quantification. The assays were performed in biological and experimental triplicates and  
596 the data were expressed as SEM. The *E. coli* C1845 and laboratory *E. coli* MA3456  
597 strains were used as adherent and non-adherent control strains, respectively.

598

#### 599 **Short period invasion assay in HeLa, Caco-2, and T24 cells.**

600 The invasion assays were carried out as described by Martinez et al. [86], with  
601 modifications, in two sets of plates simultaneously. Aliquots of 20 µL or 40 µL of  
602 overnight bacterial cultures were inoculated in each well-containing epithelial cells, as

[Research article]

[Santos et al., 2019]

603 described above, and were incubated for 2 h, at 37°C, in a normal atmosphere. After this  
604 period, one plate set was washed three times with PBS and incubated again with PBS  
605 containing 100 µg/mL of amikacin for 1 hour at 37°C, to kill all extracellular bacteria.  
606 After the incubation period, the assay was washed three times to remove all antibiotics,  
607 cells were lysed with water, and the well contents were collected, diluted and plated onto  
608 MacConkey agar to obtain the number of internalized bacteria. The other set was washed  
609 with PBS three times, the cells were lysed, and contents of each well were collected,  
610 diluted and plated to obtain the total number of bacteria interacting with the cells in the  
611 period. An aliquot of the PBS recovered from the last wash after incubation with amikacin  
612 was collected and plated without dilution, to ensure that the treatment had killed all  
613 extracellular bacteria. The initial inoculum was determined for each strain by serial  
614 dilutions, plating, and counting the colony-forming units per milliliter (CFU/mL) before  
615 starting the assay. The invasion index was determined by the ratio between the number  
616 of internalized bacteria and the total number of interacting bacteria multiplied per 100.  
617 The *Shigella flexneri* strain M90T was used as an invasive control [87] and the  
618 *Escherichia albertii* strain 1551::*eae* was used as adherent and non-invasive control [88].  
619 The assays were performed in biological and experimental triplicates, and data were  
620 reported as SEM.

[Research article]

[Santos et al., 2019]

## 621 **Acknowledgments**

622 We are grateful to the Laboratório Especial de Microbiologia Clínica (LEMC) of the  
623 Federal University of São Paulo (UNIFESP), São Paulo - SP, Brazil, for providing the *E.*  
624 *coli* strain EC121.

625

## 626 **Financial support**

627 This study was supported by Fundação de Amparo à Pesquisa do Estado de São Paulo  
628 (FAPESP) that provided research grants to E.C. (Process Number: 16/01656-5), R.M.S.  
629 (Process Number: 2009/00402-6), T.A.T.G. (Process Number: 2018/17353-7), and  
630 master scholarship to T.B.V. (Process Number: 2017/21947-7). We are also grateful to  
631 the Coordenação de Aperfeiçoamento de Pessoal de Nível Superior (CAPES) for  
632 providing grants under finance code 001 to A.C.M.S. (PNPD), A.P.S. (PhD), C.S.N.  
633 (PhD), and to the National Council for Science and Technological Development (CNPq)  
634 for providing grant to A.C.G. (Process number: 305535/2014-5).

635

## 636 **Ethics**

637 The strain EC121 used in this research was obtained from clinical routine after laboratory  
638 procedures. No additional procedure was performed to acquire any bacterial strain, so the  
639 consent form was not required as determinate by the Brazilian National Health Council  
640 nº 466/12 and 510/16. All patient information was obtained from medical records, and  
641 the research was done with the approval of the local Research Ethics Committee of the  
642 Federal University of São Paulo - UNIFESP/São Paulo Hospital (CEP 2031/08 and CEP  
643 N 7140160317).

644

645



[Research article]

[Santos et al., 2019]

646 **Competing interests**

647 A.C.G. has recently received research funding and/or consultation fees from Eurofarma,

648 MSD, Pfizer, and Zambon. Other authors have nothing to declare. This study was not

649 financially supported by any Diagnostic/Pharmaceutical company.

[Research article]

[Santos et al., 2019]

650 **Supporting information captions**

651 **Table S1** – ST101 complex strains, NCBI accession, multidrug resistance genotype,  
652 source, and country of isolation.

653 **Table S2** – Type V Secretion system protein identified by MaSyFinder.

654 **Table S3** – Complete Genetic cluster identified in EC121 strain and their predicted  
655 association with virulence.

656 **Table S4** -Virulence genes identification and validation in NCBI and Swiss-Prot.

657 **Table S5** - Detailed information of all predicted phages detected in strain EC121.

658 **Fig S1** – Phylogenetic relationship among 62 human isolates from the ST101 complex

659 **Fig S2** – Phylogenetic relationship obtained from sequence alignment to plasmid IncHI2  
660 pEC121.A, using BLASTn

661 **Fig S3** – Phylogenetic relationship obtained from sequence alignment to plasmid  
662 IncFIB/IncFII pEC121.B, using BLASTn

663 **Fig S4** – Phylogenetic relationship obtained from sequence alignment to plasmid IncL/M  
664 pEC121.C, using BLASTn

665 **Fig S5** – EC121 interaction and invasion assay in Eukaryotic cell lineages

666 **Fig S6** – EC121 adherence in eukaryotic cell linages HeLa, Caco-2, and T24.

667 **References**

- 668 1. Biedenbach DJ, Moet GJ, Jones RN. Occurrence and antimicrobial resistance  
669 pattern comparisons among bloodstream infection isolates from the SENTRY  
670 Antimicrobial Surveillance Program (1997–2002). *Diagn Microbiol Infect Dis.*  
671 2004;50(1):59-69. doi:10.1016/J.DIAGMICROBIO.2004.05.003
- 672 2. Temkin E, Fallach N, Almagor J, et al. Estimating the number of infections  
673 caused by antibiotic-resistant *Escherichia coli* and *Klebsiella pneumoniae* in  
674 2014: a modelling study. *Lancet Glob Heal.* 2018;6(9):e969-e979.  
675 doi:10.1016/S2214-109X(18)30278-X
- 676 3. Tu B, Liu SX, Wu D, et al. [Clinical features of community-acquired  
677 bloodstream infection due to Gram-negative bacilli in patients with liver  
678 cirrhosis]. *Zhonghua Gan Zang Bing Za Zhi.* 2018;26(1):23-27.  
679 doi:10.3760/cma.j.issn.1007-3418.2018.01.007
- 680 4. Satwani P, Freedman JL, Chaudhury S, et al. A Multicenter Study of Bacterial  
681 Blood Stream Infections in Pediatric Allogeneic Hematopoietic Cell  
682 Transplantation Recipients: The Role of Acute Gastrointestinal Graft-versus-Host  
683 Disease. *Biol Blood Marrow Transplant.* 2017;23(4):642-647.  
684 doi:10.1016/j.bbmt.2017.01.073
- 685 5. Nivesvivat T, Piyaraj P, Thunyaharn S, Watanaveeradej V, Suwanpakdee D.  
686 Clinical epidemiology, risk factors and treatment outcomes of extended-spectrum  
687 beta-lactamase producing *Enterobacteriaceae* bacteremia among children in a  
688 Tertiary Care Hospital, Bangkok, Thailand. *BMC Res Notes.* 2018;11(1):624.  
689 doi:10.1186/s13104-018-3729-3
- 690 6. GLASS | Global antimicrobial resistance surveillance system (GLASS) report.  
691 *WHO.* 2018. <https://www.who.int/glass/resources/publications/early->

[Research article]

[Santos et al., 2019]

- 692 implementation-report/en/. Accessed June 17, 2019.
- 693 7. Landman WJM, van Eck JHH. The incidence and economic impact of the  
694 *Escherichia coli* peritonitis syndrome in Dutch poultry farming. *Avian Pathol.*  
695 2015;44(5):370-378. doi:10.1080/03079457.2015.1060584
- 696 8. Kaye KS, Marchaim D, Chen T-Y, et al. Effect of Nosocomial Bloodstream  
697 Infections on Mortality, Length of Stay, and Hospital Costs in Older Adults. *J*  
698 *Am Geriatr Soc.* 2014;62(2):306-311. doi:10.1111/jgs.12634
- 699 9. Barriere SL. Clinical, economic and societal impact of antibiotic resistance.  
700 *Expert Opin Pharmacother.* 2015;16(2):151-153.  
701 doi:10.1517/14656566.2015.983077
- 702 10. Ciorba V, Odone A, Veronesi L, Pasquarella C, Signorelli C. Antibiotic  
703 resistance as a major public health concern: epidemiology and economic impact.  
704 *Ann Ig.* 27(3):562-579. doi:10.7416/ai.2015.2048
- 705 11. Johnson JR, Russo TA. Extraintestinal pathogenic *Escherichia coli* : “The other  
706 bad *E coli* .” *J Lab Clin Med.* 2002;139(3):155-162.  
707 doi:10.1067/mlc.2002.121550
- 708 12. Johnson JR, Murray AC, Gajewski A, et al. Isolation and molecular  
709 characterization of nalidixic acid-resistant extraintestinal pathogenic *Escherichia*  
710 *coli* from retail chicken products. *Antimicrob Agents Chemother.*  
711 2003;47(7):2161-2168. doi:10.1128/aac.47.7.2161-2168.2003
- 712 13. Spurbeck RR, Dinh PC, Walk ST, et al. *Escherichia coli* isolates that carry vat,  
713 *fyuA*, *chuA*, and *yfcV* efficiently colonize the urinary tract. *Infect Immun.*  
714 2012;80(12):4115-4122. doi:10.1128/IAI.00752-12
- 715 14. Santos ACM, Zidko ACM, Pignatari AC, Silva RM. Assessing the diversity of  
716 the virulence potential of *Escherichia coli* isolated from bacteremia in São Paulo,

[Research article]

[Santos et al., 2019]

- 717 Brazil. *Brazilian J Med Biol Res = Rev Bras Pesqui medicas e Biol.*  
718 2013;46(11):968-973. doi:10.1590/1414-431X20133184
- 719 15. Zhao L, Zhang J, Zheng B, et al. Molecular Epidemiology and Genetic Diversity  
720 of Fluoroquinolone-Resistant *Escherichia coli* Isolates from Patients with  
721 Community-Onset Infections in 30 Chinese County Hospitals. *J Clin Microbiol.*  
722 2015;53(3):766-770. doi:10.1128/JCM.02594-14
- 723 16. Izdebski R, Baraniak A, Herda M, et al. MLST reveals potentially high-risk  
724 international clones of *Enterobacter cloacae*\*. *J Antimicrob Chemother.*  
725 2015;70(1):48-56. doi:10.1093/jac/dku359
- 726 17. Brauner J, Hallin M, Deplano A, et al. Community-acquired methicillin-resistant  
727 *Staphylococcus aureus* clones circulating in Belgium from 2005 to 2009:  
728 changing epidemiology. *Eur J Clin Microbiol Infect Dis.* 2013;32(5):613-620.  
729 doi:10.1007/s10096-012-1784-6
- 730 18. Riley LW. Pandemic lineages of extraintestinal pathogenic *Escherichia coli*. *Clin*  
731 *Microbiol Infect.* 2014;20(5):380-390. doi:10.1111/1469-0691.12646
- 732 19. Roer L, Overballe-Petersen S, Hansen F, et al. *Escherichia coli* Sequence Type  
733 410 Is Causing New International High-Risk Clones. *mSphere.*  
734 2018;3(4):e00337-18. doi:10.1128/mSphere.00337-18
- 735 20. Reineke K, Sevenich R, Hertwig C, et al. Comparative study on the high pressure  
736 inactivation behavior of the Shiga toxin-producing *Escherichia coli* O104:H4 and  
737 O157:H7 outbreak strains and a non-pathogenic surrogate. *Food Microbiol.*  
738 2015;46:184-194. doi:10.1016/J.FM.2014.07.017
- 739 21. Kennedy CA, Walsh C, Karczmarczyk M, et al. Multi-drug resistant *Escherichia*  
740 *coli* in diarrhoeagenic foals: Pulsotyping, phylotyping, serotyping, antibiotic  
741 resistance and virulence profiling. *Vet Microbiol.* 2018;223:144-152.

[Research article]

[Santos et al., 2019]

- 742           doi:10.1016/J.VETMIC.2018.08.009
- 743    22.    WHO | Global action plan on antimicrobial resistance. *WHO*. 2017.
- 744           <https://www.who.int/antimicrobial-resistance/publications/global-action-plan/en/>.
- 745           Accessed June 17, 2019.
- 746    23.    Shaik S, Ranjan A, Tiwari SK, et al. Comparative Genomic Analysis of Globally
- 747           Dominant ST131 Clone with Other Epidemiologically Successful Extraintestinal
- 748           Pathogenic *Escherichia coli* (ExPEC) Lineages. *MBio*. 2017;8(5):e01596-17.
- 749           doi:10.1128/mBio.01596-17
- 750    24.    Magiorakos A-P, Srinivasan A, Carey RB, et al. Multidrug-resistant, extensively
- 751           drug-resistant and pandrug-resistant bacteria: an international expert proposal for
- 752           interim standard definitions for acquired resistance. *Clin Microbiol Infect*.
- 753           2012;18(3):268-281. doi:10.1111/J.1469-0691.2011.03570.X
- 754    25.    Santos AC de M. Potencial de virulência e suscetibilidade a antimicrobianos de
- 755           amostras de *Escherichia coli* isoladas de bacteremia: sua relação com o estado de
- 756           imunocompetência do paciente e a origem da infecção. 2013.
- 757           <http://repositorio.unifesp.br/handle/11600/22975>. Accessed June 20, 2019.
- 758    26.    Ranjan A, Shaik S, Mondal A, et al. Molecular Epidemiology and Genome
- 759           Dynamics of New Delhi Metallo- $\beta$ -Lactamase-Producing Extraintestinal
- 760           Pathogenic *Escherichia coli* Strains from India. *Antimicrob Agents Chemother*.
- 761           2016;60(11):6795-6805. doi:10.1128/AAC.01345-16
- 762    27.    Pfeifer Y, Trifonova A, Pietsch M, et al. Clonal Transmission of Gram-Negative
- 763           Bacteria with Carbapenemases NDM-1, VIM-1, and OXA-23/72 in a Bulgarian
- 764           Hospital. *Microb Drug Resist*. 2017;23(3):301-307. doi:10.1089/mdr.2016.0059
- 765    28.    Poirel L, Lagrutta E, Taylor P, Pham J, Nordmann P. Emergence of metallo- $\beta$ -
- 766           lactamase NDM-1-producing multidrug-resistant *Escherichia coli* in Australia.

[Research article]

[Santos et al., 2019]

- 767            *Antimicrob Agents Chemother.* 2010;54(11):4914-4916.  
768            doi:10.1128/AAC.00878-10
- 769    29.    Poirel L, Savov E, Nazli A, et al. Outbreak caused by NDM-1- and RmtB-  
770            producing *Escherichia coli* in Bulgaria. *Antimicrob Agents Chemother.*  
771            2014;58(4):2472-2474. doi:10.1128/AAC.02571-13
- 772    30.    Yoo JS, Kim HM, Koo HS, et al. Nosocomial transmission of NDM-1-producing  
773            *Escherichia coli* ST101 in a Korean hospital. *J Antimicrob Chemother.*  
774            2013;68(9):2170-2172. doi:10.1093/jac/dkt126
- 775    31.    Yamaji R, Friedman CR, Rubin J, et al. A Population-Based Surveillance Study  
776            of Shared Genotypes of *Escherichia coli* Isolates from Retail Meat and Suspected  
777            Cases of Urinary Tract Infections. *mSphere.* 2018;3(4):e00179-18.  
778            doi:10.1128/mSphere.00179-18
- 779    32.    Fernandes MR, McCulloch JA, Vianello MA, et al. First Report of the Globally  
780            Disseminated IncX4 Plasmid Carrying the *mcr-1* Gene in a Colistin-Resistant  
781            *Escherichia coli* Sequence Type 101 Isolate from a Human Infection in Brazil.  
782            *Antimicrob Agents Chemother.* 2016;60(10):6415-6417.  
783            doi:10.1128/AAC.01325-16
- 784    33.    GERHOLD G, SCHULZE MH, GROSS U, BOHNE W. Multilocus sequence  
785            typing and CTX-M characterization of ESBL-producing *E. coli* : a prospective  
786            single-centre study in Lower Saxony, Germany. *Epidemiol Infect.*  
787            2016;144(15):3300-3304. doi:10.1017/S0950268816001412
- 788    34.    Khan ER, Aung MS, Paul SK, et al. Prevalence and Molecular Epidemiology of  
789            Clinical Isolates of *Escherichia coli* and *Klebsiella pneumoniae* Harboring  
790            Extended-Spectrum Beta-Lactamase and Carbapenemase Genes in Bangladesh.  
791            *Microb Drug Resist.* 2018;24(10):1568-1579. doi:10.1089/mdr.2018.0063

[Research article]

[Santos et al., 2019]

- 792 35. Pfeifer Y, Witte W, Holfelder M, Busch J, Nordmann P, Poirel L. NDM-1-  
793 producing Escherichia coli in Germany. *Antimicrob Agents Chemother.*  
794 2011;55(3):1318-1319. doi:10.1128/AAC.01585-10
- 795 36. Williamson DA, Freeman JT, Roberts SA, et al. Rectal colonization with New  
796 Delhi metallo- $\beta$ -lactamase-1-producing Escherichia coli prior to transrectal  
797 ultrasound (TRUS)-guided prostate biopsy. *J Antimicrob Chemother.*  
798 2013;68(12):2957-2959. doi:10.1093/jac/dkt266
- 799 37. Potron A, Poirel L, Rondinaud E, Nordmann P. Intercontinental spread of OXA-  
800 48 beta-lactamase-producing Enterobacteriaceae over a 11-year period, 2001 to  
801 2011. *Eurosurveillance.* 2013;18(31):20549. doi:10.2807/1560-  
802 7917.ES2013.18.31.20549
- 803 38. Samuelsen Ø, Overballe-Petersen S, Bjørnholt JV, et al. Molecular and  
804 epidemiological characterization of carbapenemase-producing Enterobacteriaceae  
805 in Norway, 2007 to 2014. Butaye P, ed. *PLoS One.* 2017;12(11):e0187832.  
806 doi:10.1371/journal.pone.0187832
- 807 39. Mantilla-Calderon D, Jumat MR, Wang T, Ganesan P, Al-Jassim N, Hong P-Y.  
808 Isolation and Characterization of NDM-Positive Escherichia coli from Municipal  
809 Wastewater in Jeddah, Saudi Arabia. *Antimicrob Agents Chemother.*  
810 2016;60(9):5223-5231. doi:10.1128/AAC.00236-16
- 811 40. Braga JFV, Chanteloup NK, Trotereau A, et al. Diversity of Escherichia coli  
812 strains involved in vertebral osteomyelitis and arthritis in broilers in Brazil. *BMC*  
813 *Vet Res.* 2016;12(1):140. doi:10.1186/s12917-016-0762-0
- 814 41. Koo H-J, Kwak H-S, Yoon S-H, Woo G-J. Phylogenetic group distribution and  
815 prevalence of virulence genes in Escherichia coli isolates from food samples in  
816 South Korea. *World J Microbiol Biotechnol.* 2012;28(4):1813-1816.



[Research article]

[Santos et al., 2019]

- 817           doi:10.1007/s11274-011-0954-5
- 818   42.   Müller A, Jansen W, Grabowski NT, Monecke S, Ehricht R, Kehrenberg C.  
819           ESBL- and AmpC-producing *Escherichia coli* from legally and illegally imported  
820           meat: Characterization of isolates brought into the EU from third countries. *Int J*  
821           *Food Microbiol.* 2018;283:52-58. doi:10.1016/J.IJFOODMICRO.2018.06.009
- 822   43.   Xie M, Lin D, Chen K, Chan EWC, Yao W, Chen S. Molecular Characterization  
823           of *Escherichia coli* Strains Isolated from Retail Meat That Harbor blaCTX-M and  
824           fosA3 Genes. *Antimicrob Agents Chemother.* 2016;60(4):2450-2455.  
825           doi:10.1128/AAC.03101-15
- 826   44.   Wu C, Wang Y, Shi X, et al. Rapid rise of the ESBL and *mcr-1* genes in  
827           *Escherichia coli* of chicken origin in China, 2008–2014. *Emerg Microbes Infect.*  
828           2018;7(1):1-10. doi:10.1038/s41426-018-0033-1
- 829   45.   Boehmer T, Vogler AJ, Thomas A, et al. Phenotypic characterization and whole  
830           genome analysis of extended-spectrum beta-lactamase-producing bacteria  
831           isolated from dogs in Germany. Mokrousov I, ed. *PLoS One.*  
832           2018;13(10):e0206252. doi:10.1371/journal.pone.0206252
- 833   46.   Zhou X, García-Cobos S, Ruijs GJHM, et al. Epidemiology of Extended-  
834           Spectrum  $\beta$ -Lactamase-Producing *E. coli* and Vancomycin-Resistant Enterococci  
835           in the Northern Dutch–German Cross-Border Region. *Front Microbiol.*  
836           2017;8:1914. doi:10.3389/fmicb.2017.01914
- 837   47.   Wang Y, Tian G-B, Zhang R, et al. Prevalence, risk factors, outcomes, and  
838           molecular epidemiology of *mcr-1*-positive Enterobacteriaceae in patients and  
839           healthy adults from China: an epidemiological and clinical study. *Lancet Infect*  
840           *Dis.* 2017;17(4):390-399. doi:10.1016/S1473-3099(16)30527-8
- 841   48.   Shrestha B, Tada T, Miyoshi-Akiyama T, et al. Identification of a novel NDM

[Research article]

[Santos et al., 2019]

- 842 variant, NDM-13, from a multidrug-resistant *Escherichia coli* clinical isolate in  
843 Nepal. *Antimicrob Agents Chemother.* 2015;59(9):5847-5850.  
844 doi:10.1128/AAC.00332-15
- 845 49. Herrero-Fresno A, Zachariassen C, Hansen MH, et al. Apramycin treatment  
846 affects selection and spread of a multidrug-resistant *Escherichia coli* strain able to  
847 colonize the human gut in the intestinal microbiota of pigs. *Vet Res.*  
848 2016;47(1):12. doi:10.1186/s13567-015-0291-z
- 849 50. Trobos M, Lester CH, Olsen JE, Frimodt-Moller N, Hammerum AM. Natural  
850 transfer of sulphonamide and ampicillin resistance between *Escherichia coli*  
851 residing in the human intestine. *J Antimicrob Chemother.* 2009;63(1):80-86.  
852 doi:10.1093/jac/dkn437
- 853 51. Picard B, Garcia JS, Gouriou S, et al. The link between phylogeny and virulence  
854 in *Escherichia coli* extraintestinal infection. *Infect Immun.* 1999;67(2):546-553.  
855 <http://www.ncbi.nlm.nih.gov/pubmed/9916057>. Accessed June 21, 2019.
- 856 52. Johnson JR, Clermont O, Menard M, Kuskowski MA, Picard B, Denamur E.  
857 Experimental Mouse Lethality of *Escherichia coli* Isolates, in Relation to  
858 Accessory Traits, Phylogenetic Group, and Ecological Source. *J Infect Dis.*  
859 2006;194(8):1141-1150. doi:10.1086/507305
- 860 53. Duriez P, Clermont O, Picard B, et al. Commensal *Escherichia coli* isolates are  
861 phylogenetically distributed among geographically distinct human populations.  
862 *Microbiology.* 2001;147(6):1671-1676. doi:10.1099/00221287-147-6-1671
- 863 54. Hallström T, Resman F, Ristovski M, Riesbeck K. Binding of complement  
864 regulators to invasive nontypeable *Haemophilus influenzae* isolates is not  
865 increased compared to nasopharyngeal isolates, but serum resistance is linked to  
866 disease severity. *J Clin Microbiol.* 2010;48(3):921-927. doi:10.1128/JCM.01654-

[Research article]

[Santos et al., 2019]

- 867 09
- 868 55. Hughes C, Phillips R, Roberts AP. Serum resistance among *Escherichia coli*  
869 strains causing urinary tract infection in relation to O type and the carriage of  
870 hemolysin, colicin, and antibiotic resistance determinants. *Infect Immun*.  
871 1982;35(1):270-275. <http://www.ncbi.nlm.nih.gov/pubmed/7033137>. Accessed  
872 June 21, 2019.
- 873 56. Adler NRL, Stevens MP, Dean RE, et al. Systematic Mutagenesis of Genes  
874 Encoding Predicted Autotransported Proteins of *Burkholderia pseudomallei*  
875 Identifies Factors Mediating Virulence in Mice, Net Intracellular Replication and  
876 a Novel Protein Conferring Serum Resistance. Wooten RM, ed. *PLoS One*.  
877 2015;10(4):e0121271. doi:10.1371/journal.pone.0121271
- 878 57. Desroches M, Clermont O, Lafeuillade B, et al. Genotypic and phenotypic  
879 characteristics of *Escherichia coli* involved in transfusion-transmitted bacterial  
880 infections: implications for preventive strategies. *Transfusion*. 2018;58(8):1940-  
881 1950. doi:10.1111/trf.14812
- 882 58. Peirano G, Mulvey GL, Armstrong GD, Pitout JDD. Virulence potential and  
883 adherence properties of *Escherichia coli* that produce CTX-M and NDM  $\beta$ -  
884 lactamases. *J Med Microbiol*. 2013;62(4):525-530. doi:10.1099/jmm.0.048983-0
- 885 59. Hauser E, Mellmann A, Semmler T, et al. Phylogenetic and molecular analysis of  
886 food-borne shiga toxin-producing *Escherichia coli*. *Appl Environ Microbiol*.  
887 2013;79(8):2731-2740. doi:10.1128/AEM.03552-12
- 888 60. Mellmann A, Bielaszewska M, Köck R, et al. Analysis of Collection of  
889 Hemolytic Uremic Syndrome-associated Enterohemorrhagic *Escherichia coli*.  
890 *Emerg Infect Dis*. 2008;14(8):1287-1290. doi:10.3201/eid1408.071082
- 891 61. Bai X, Mernelius S, Jernberg C, et al. Shiga Toxin-Producing *Escherichia coli*

[Research article]

[Santos et al., 2019]

- 892 Infection in Jönköping County, Sweden: Occurrence and Molecular  
893 Characteristics in Correlation With Clinical Symptoms and Duration of stx  
894 Shedding. *Front Cell Infect Microbiol.* 2018;8:125.  
895 doi:10.3389/fcimb.2018.00125
- 896 62. Ferdous M, Friedrich AW, Grundmann H, et al. Molecular characterization and  
897 phylogeny of Shiga toxin-producing *Escherichia coli* isolates obtained from two  
898 Dutch regions using whole genome sequencing. *Clin Microbiol Infect.*  
899 2016;22(7):642.e1-642.e9. doi:10.1016/j.cmi.2016.03.028
- 900 63. Bankevich A, Nurk S, Antipov D, et al. SPAdes: A New Genome Assembly  
901 Algorithm and Its Applications to Single-Cell Sequencing. *J Comput Biol.*  
902 2012;19(5):455-477. doi:10.1089/cmb.2012.0021
- 903 64. Larsen M V, Cosentino S, Rasmussen S, et al. Multilocus sequence typing of  
904 total-genome-sequenced bacteria. *J Clin Microbiol.* 2012;50(4):1355-1361.  
905 doi:10.1128/JCM.06094-11
- 906 65. Joensen KG, Tetzschner AMM, Iguchi A, Aarestrup FM, Scheutz F. Rapid and  
907 Easy In Silico Serotyping of *Escherichia coli* Isolates by Use of Whole-Genome  
908 Sequencing Data. *J Clin Microbiol.* 2015;53(8):2410-2426.  
909 doi:10.1128/JCM.00008-15
- 910 66. Carattoli A, Zankari E, García-Fernández A, et al. In silico detection and typing  
911 of plasmids using PlasmidFinder and plasmid multilocus sequence typing.  
912 *Antimicrob Agents Chemother.* 2014;58(7):3895-3903. doi:10.1128/AAC.02412-  
913 14
- 914 67. Zankari E, Hasman H, Cosentino S, et al. Identification of acquired antimicrobial  
915 resistance genes. *J Antimicrob Chemother.* 2012;67(11):2640-2644.  
916 doi:10.1093/jac/dks261

[Research article]

[Santos et al., 2019]

- 917 68. Joensen KG, Scheutz F, Lund O, et al. Real-time whole-genome sequencing for  
918 routine typing, surveillance, and outbreak detection of verotoxigenic *Escherichia*  
919 *coli*. *J Clin Microbiol*. 2014;52(5):1501-1510. doi:10.1128/JCM.03617-13
- 920 69. Arndt D, Grant JR, Marcu A, et al. PHASTER: a better, faster version of the  
921 PHAST phage search tool. *Nucleic Acids Res*. 2016;44(W1):W16-W21.  
922 doi:10.1093/nar/gkw387
- 923 70. Zhou Y, Liang Y, Lynch KH, Dennis JJ, Wishart DS. PHAST: A Fast Phage  
924 Search Tool. *Nucleic Acids Res*. 2011;39(suppl):W347-W352.  
925 doi:10.1093/nar/gkr485
- 926 71. Wattam AR, Davis JJ, Assaf R, et al. Improvements to PATRIC, the all-bacterial  
927 Bioinformatics Database and Analysis Resource Center. *Nucleic Acids Res*.  
928 2017;45(D1):D535-D542. doi:10.1093/nar/gkw1017
- 929 72. Altschul S, Madden TL, Schäffer AA, et al. Gapped BLAST and PSI-BLAST: a  
930 new generation of protein database search programs. *Nucleic Acids Res*.  
931 1997;25(17):3389-3402. doi:10.1093/nar/25.17.3389
- 932 73. UniProt: a worldwide hub of protein knowledge. *Nucleic Acids Res*.  
933 2019;47(D1):D506-D515. doi:10.1093/nar/gky1049
- 934 74. Letunic I, Bork P. Interactive Tree Of Life (iTOL) v4: recent updates and new  
935 developments. *Nucleic Acids Res*. 2019;47(W1):W256-W259.  
936 doi:10.1093/nar/gkz239
- 937 75. Mareuil F, Doppelt-Azeroual O, Ménager H, Mareuil F, Doppelt-Azeroual O,  
938 Ménager H. A public Galaxy platform at Pasteur used as an execution engine for  
939 web services. *F1000Research*. 2017;6.  
940 doi:10.7490/F1000RESEARCH.1114334.1
- 941 76. Abby SS, Néron B, Ménager H, Touchon M, Rocha EPC. MacSyFinder: A

[Research article]

[Santos et al., 2019]

- 942 Program to Mine Genomes for Molecular Systems with an Application to  
943 CRISPR-Cas Systems. Torres N V., ed. *PLoS One*. 2014;9(10):e110726.  
944 doi:10.1371/journal.pone.0110726
- 945 77. Abby SS, Cury J, Guglielmini J, Néron B, Touchon M, Rocha EPC.  
946 Identification of protein secretion systems in bacterial genomes. *Sci Rep*.  
947 2016;6(1):23080. doi:10.1038/srep23080
- 948 78. Orskov F, Orskov I. Escherichia coli O:H serotypes isolated from human blood.  
949 Prevalence of the K1 antigen with technical details of O and H antigenic  
950 determination. *Acta Pathol Microbiol Scand Suppl*. 1975;83(6):595-600.  
951 <http://www.ncbi.nlm.nih.gov/pubmed/1106116>. Accessed June 23, 2019.
- 952 79. Birnboim HC, Doly J. A rapid alkaline extraction procedure for screening  
953 recombinant plasmid DNA. *Nucleic Acids Res*. 1979;7(6):1513-1523.  
954 doi:10.1093/nar/7.6.1513
- 955 80. Moran RA, Anantham S, Hall RM. An improved plasmid size standard,  
956 39R861+. *Plasmid*. 2019;102:6-9. doi:10.1016/j.plasmid.2019.01.002
- 957 81. Krawczyk PS, Lipinski L, Dziembowski A. PlasFlow: predicting plasmid  
958 sequences in metagenomic data using genome signatures. *Nucleic Acids Res*.  
959 2018;46(6):e35-e35. doi:10.1093/nar/gkx1321
- 960 82. Houdouin V, Bonacorsi S, Brahimi N, Clermont O, Nassif X, Bingen E. A  
961 uropathogenicity island contributes to the pathogenicity of Escherichia coli  
962 strains that cause neonatal meningitis. *Infect Immun*. 2002;70(10):5865-5869.  
963 doi:10.1128/iai.70.10.5865-5869.2002
- 964 83. *The European Committee on Antimicrobial Susceptibility Testing. Breakpoint*  
965 *Tables for Interpretation of MICs and Zone Diameters. Version 9.0, 2019.*  
966 <http://www.eucast.org>. Accessed June 20, 2019.

[Research article]

[Santos et al., 2019]

- 967 84. Lima MP, Yamamoto D, Santos AC de M, et al. Phenotypic characterization and  
968 virulence-related properties of *Escherichia albertii* strains isolated from children  
969 with diarrhea in Brazil. *Pathog Dis*. 2019;77(2). doi:10.1093/femspd/ftz014
- 970 85. Garcia BG, Ooka T, Gotoh Y, et al. Genetic relatedness and virulence properties  
971 of enteropathogenic *Escherichia coli* strains of serotype O119:H6 expressing  
972 localized adherence or localized and aggregative adherence-like patterns on HeLa  
973 cells. *Int J Med Microbiol*. 2016;306(3):152-164.  
974 doi:10.1016/j.ijmm.2016.02.008
- 975 86. Martinez JJ, Mulvey MA, Schilling JD, Pinkner JS, Hultgren SJ. Type 1  
976 pilus-mediated bacterial invasion of bladder epithelial cells. *EMBO J*.  
977 2000;19(12):2803-2812. doi:10.1093/EMBOJ/19.12.2803
- 978 87. Sansonetti PJ, Kopecko DJ, Formal SB. Involvement of a plasmid in the invasive  
979 ability of *Shigella flexneri*. *Infect Immun*. 1982;35(3):852-860.  
980 <http://www.ncbi.nlm.nih.gov/pubmed/6279518>. Accessed June 23, 2019.
- 981 88. Hernandez RT, Silva RM, Carneiro SM, et al. The localized adherence pattern of  
982 an atypical enteropathogenic *Escherichia coli* is mediated by intimin omicron and  
983 unexpectedly promotes HeLa cell invasion. *Cell Microbiol*.  
984 2008;0(0):071003010119002-??? doi:10.1111/j.1462-5822.2007.01054.x
- 985

986 **FIGURE LEGENDS**

987 **Fig 1 - EC121 Phylogenetic tree.**

988 A phylogenetic tree was built with genomes of reference *E. coli* strains, of relevant  
989 pathogenic strains from all *E. coli* pathotypes, and some strains from ST101, using  
990 Maximum Likelihood-based algorithm (RAxML) in PATRIC. When known, the strain's  
991 pathotype was in parenthesis, following the strain identification. Diarrhegenic *E. coli*  
992 strains were in orange; Extraintestinal pathogenic *E. coli* strains were in red, commensal  
993 or strains that the origin was not described were in black. In bold and with purple label  
994 background, the strain studied in present work. Bootstrap upper than 50 were informed  
995 in the tree.

996

997 **Fig 2 - ST101 complex phylogenetic tree.**

998 The phylogenetic tree was built using 95 *E. coli* strains from ST101 complex (ST101,  
999 ST359, ST2480, ST5957, and ST6388) from diverse source and countries using all shared  
1000 protein among them on FastTree2 to build the tree. *E. coli* strain IAI1, *E. coli* O157:H7  
1001 str Sakai, and *E. coli* O104:H4 str 2011c-3493 are used as outgroups. Bootstrap upper  
1002 than 50 were informed in the tree. Label colors are related with isolates origin or host  
1003 diseases, being Shiga toxin-producing *E. coli* (STEC) in orange independently of the  
1004 origin; Diarrhegenic *E. coli* (DEC) strains in yellow; Extraintestinal pathogenic *E. coli*  
1005 (ExPEC) strains in red; isolates from microbiota in brown; isolates from retail food or  
1006 environment in green; strains that the origin was not described in black. One strain  
1007 isolated from Crohn's disease is in purple. In bold and with purple label background, the  
1008 strain of present work. \* All strains that harbor AMR for 3 or more antimicrobial classes  
1009 were designed as MDR. Other FQ (Fluoroquinolone) resistance genes detected were the



[Research article]

[Santos et al., 2019]

1010 mobile genes *qepA* and *aac(6')-Ib-cr*. Mutations that confer resistance to FQ were not  
1011 considered to build the AMR information in this tree.

1012

1013 **Fig 3 - CRISPR locus composition and biological systems assignment in EC121. A –**

1014 Genomic architecture representation of CRISPR *locus* in the EC121 genome; the image

1015 was obtained in MacSyFinder from genome annotation; **B** - Representation of EC121

1016 genome composition in subsystems based on protein biological data obtained *in silico*; **C**

1017 - EC121 genome schematic composition, based on annotation, ordered by contig size. In

1018 circle from outer to the inner, forward strand, reverse strand, RNA related genes,

1019 antimicrobial resistance, virulence factors, GC content, and GC skew. The colors in

1020 forward and reverse strands correspond to the subsystems presented in B. Figures 2B and

1021 2C were obtained using the comprehensive genome analysis service at PATRIC.

1022

1023 **Fig 4 - Plasmid content of the EC121 strain.** Negative image of the plasmid content of

1024 EC121 strain obtained by alkaline extraction, followed by electrophoresis on 0.8%

1025 agarose gel in TBE buffer. Approximate sizes were predicted based on the plasmid

1026 migration in agarose gel.

1027

1028 **Fig 5 - Adherence and biofilm formation on abiotic surfaces.** Biofilm assays were

1029 performed in DMEM, at 37°C, for 24 h. **A** - Qualitative adherence assay on a glass

1030 surface. Bacteria were stained with crystal violet, observed in optical microscopy (OM)

1031 400 x; **B** - Quantitative adherence assay on polystyrene.

1032 **Figure 6 – Classical adherence assay on HeLa cell.** The assays were performed in

1033 biological and experimental triplicates in the presence of 2% D-Mannose, except when

[Research article]

[Santos et al., 2019]

1034 indicated; M-, assay performed in the absence of 2% D-Mannose. C1845 strain was used  
1035 as adherent control; *E. coli* strain C600 was used as weakly adherent control.

1036

1037 **Fig 7– Interaction and invasion in different eukaryotic cell lineages.** Short period  
1038 invasion quantitative assay was performed in HeLa, Caco-2 and T24 cells. All assays  
1039 were carried out in the absence of D-mannose, except for EC121 M+, where 2% D-  
1040 mannose was added in the media; *S. flexneri* M90T was used as invasive control and *E.*  
1041 *albertii*1551-2::eae was used as adherent non-invasive control in HeLa and Caco-2 cells.  
1042 Data shown are the mean of the relative interaction and invasion comparing with strains  
1043 against M90T in each cell lineage.

1044 **Fig 1.**

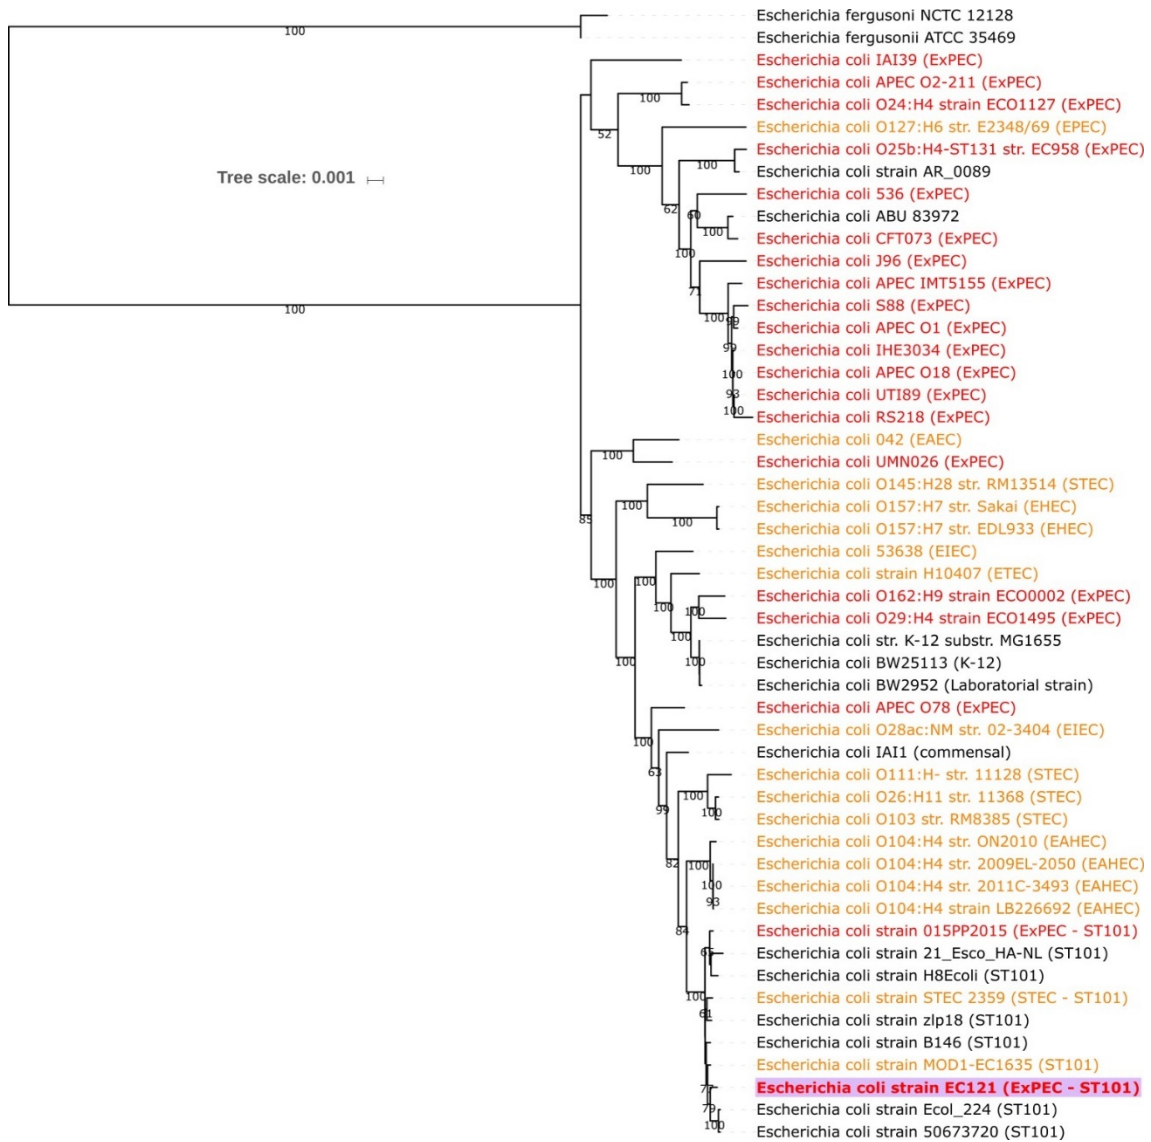

1045

1046

1047 **Fig 2.**

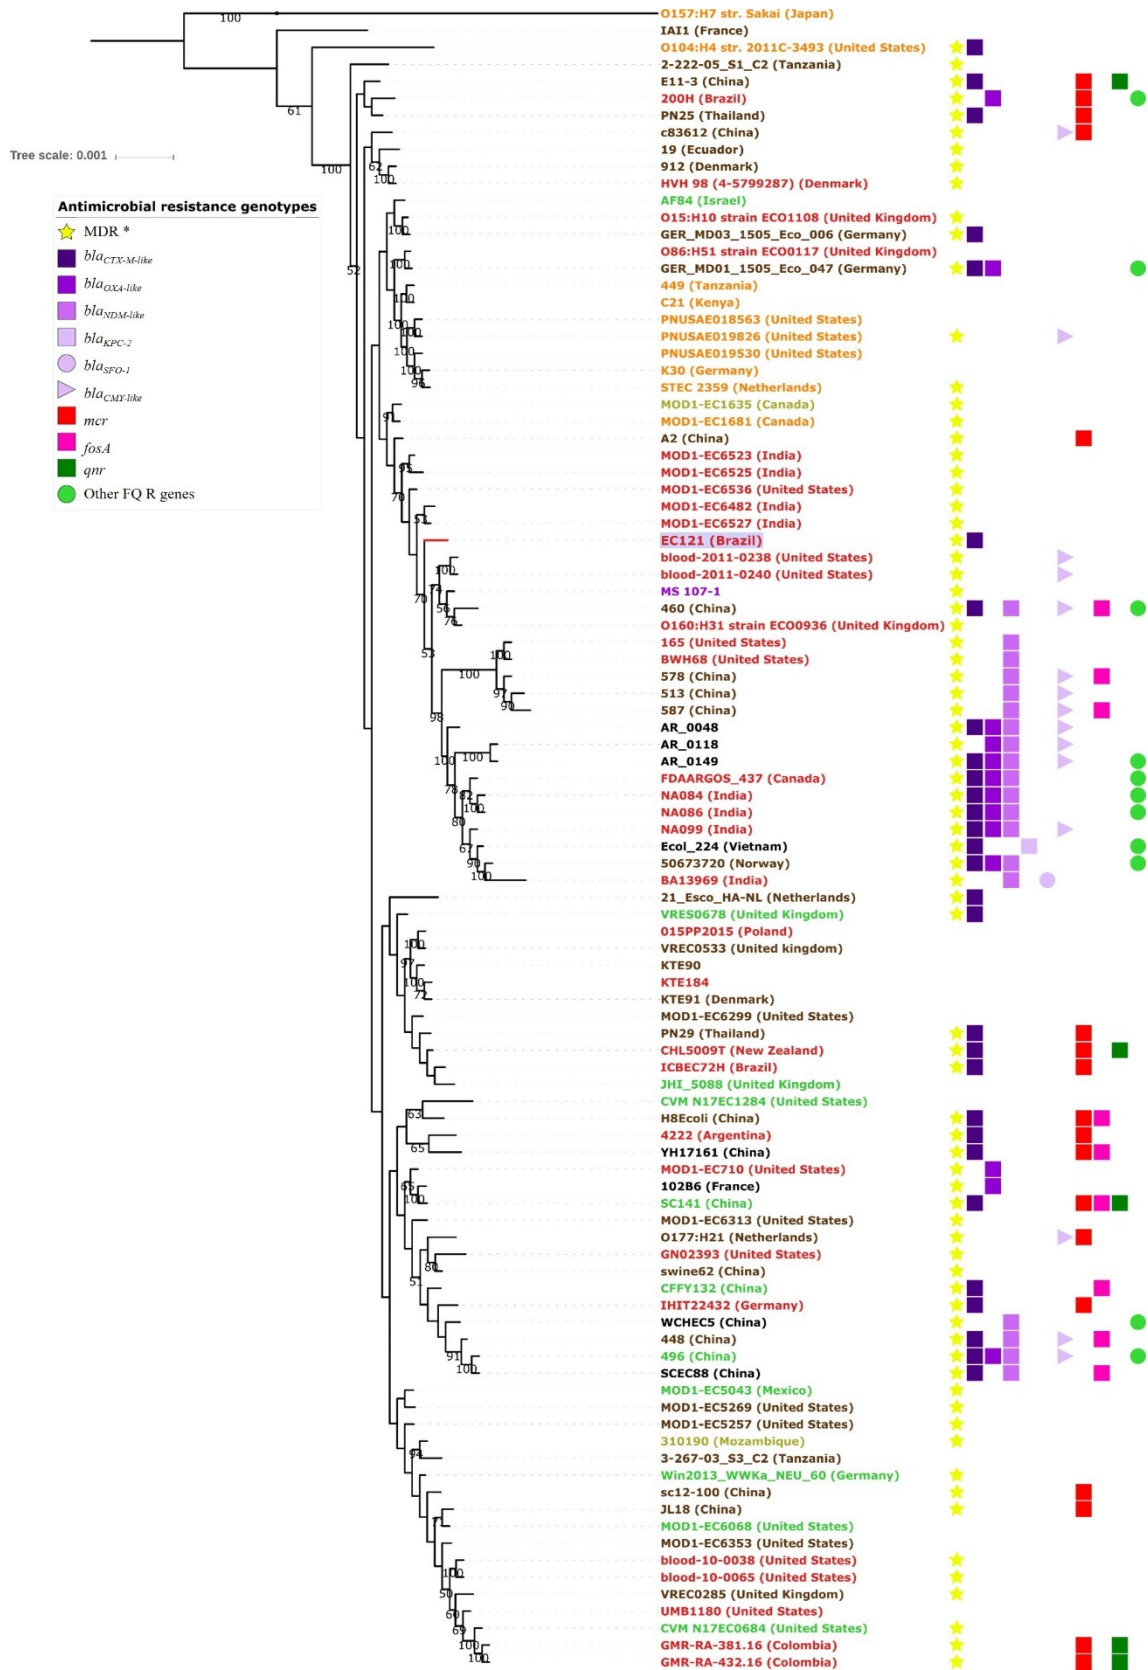

1049 **Fig 3.**

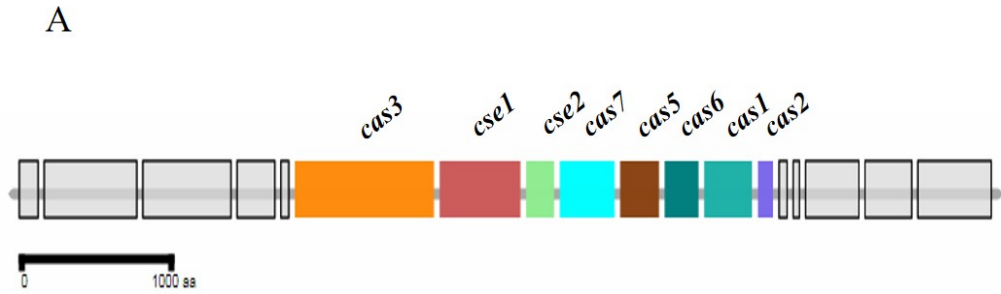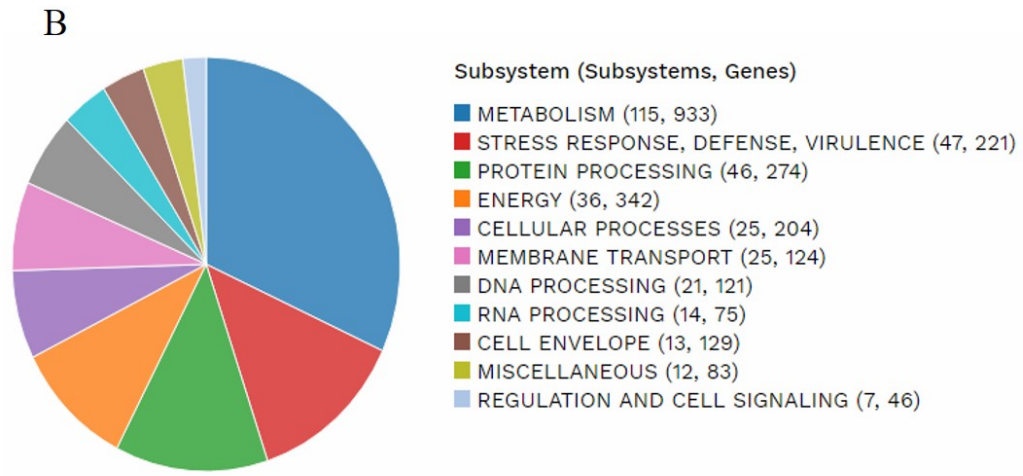

1050

1051

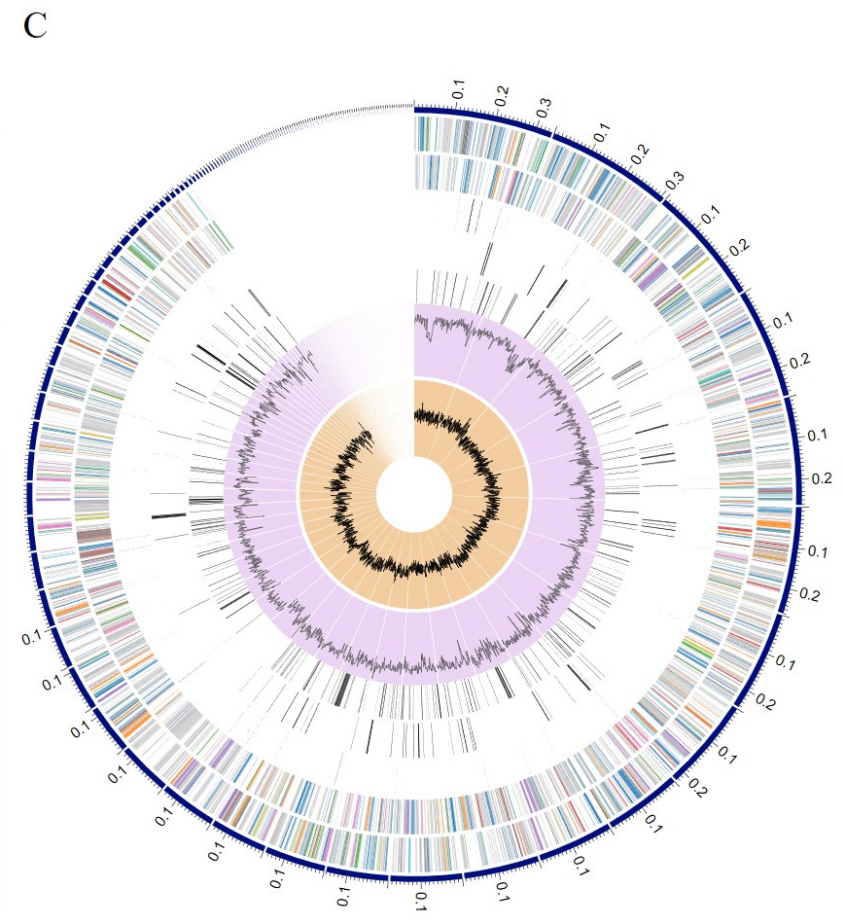

1052 **Fig 4.**

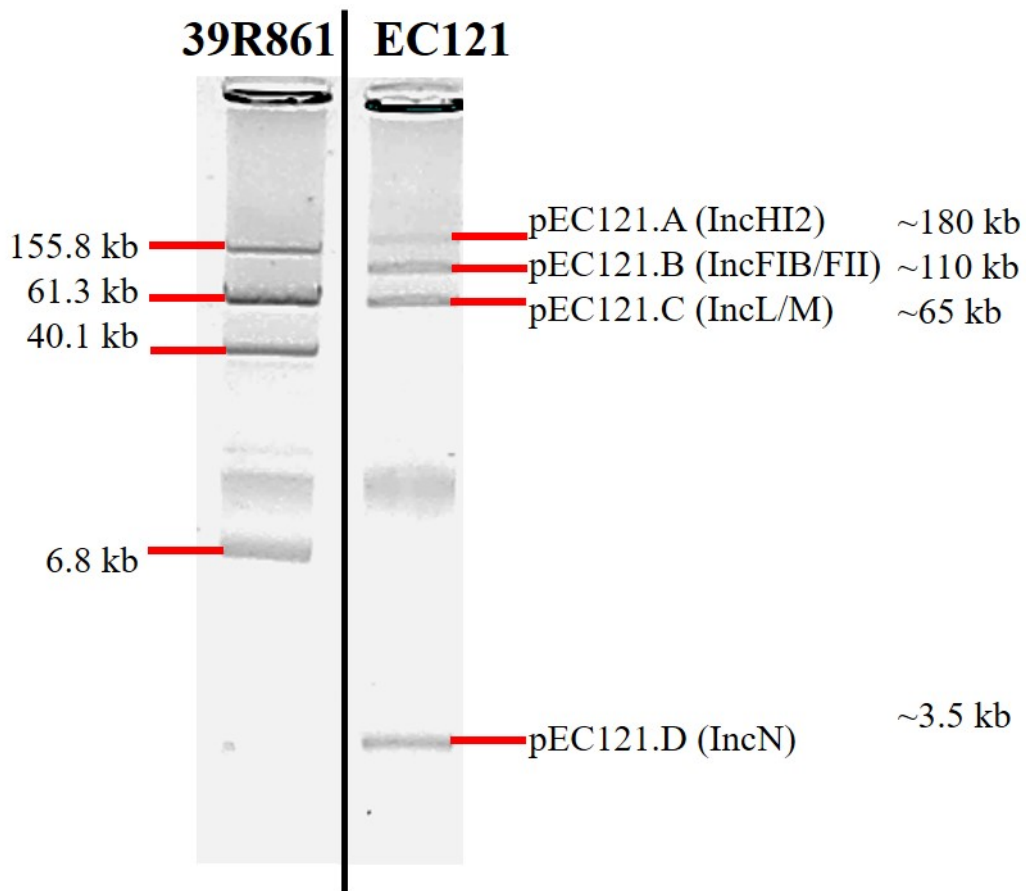

1053

1054

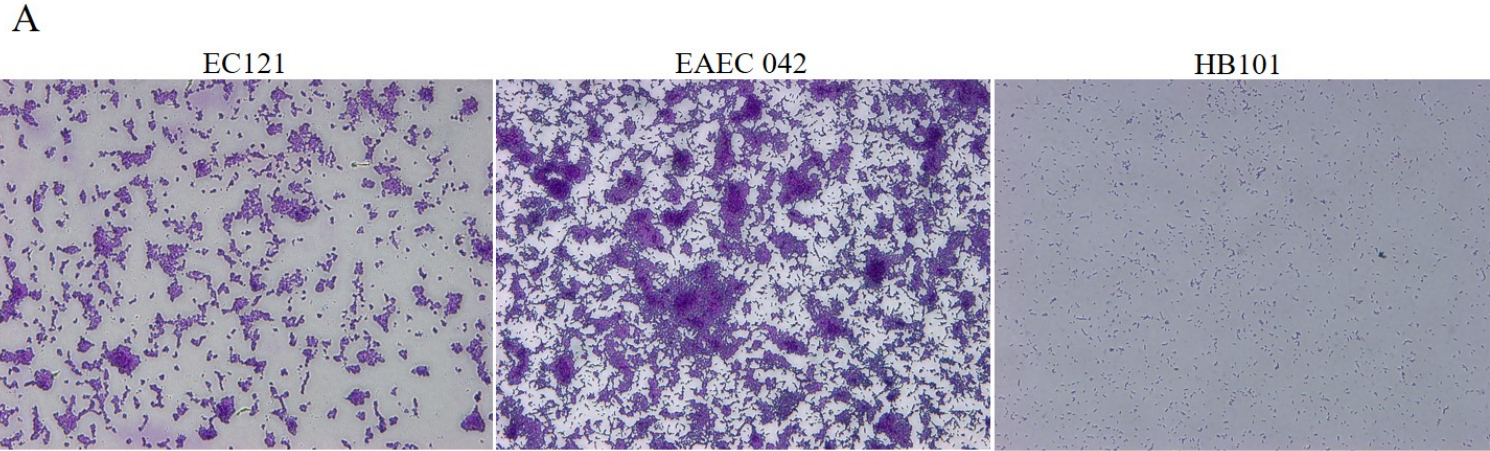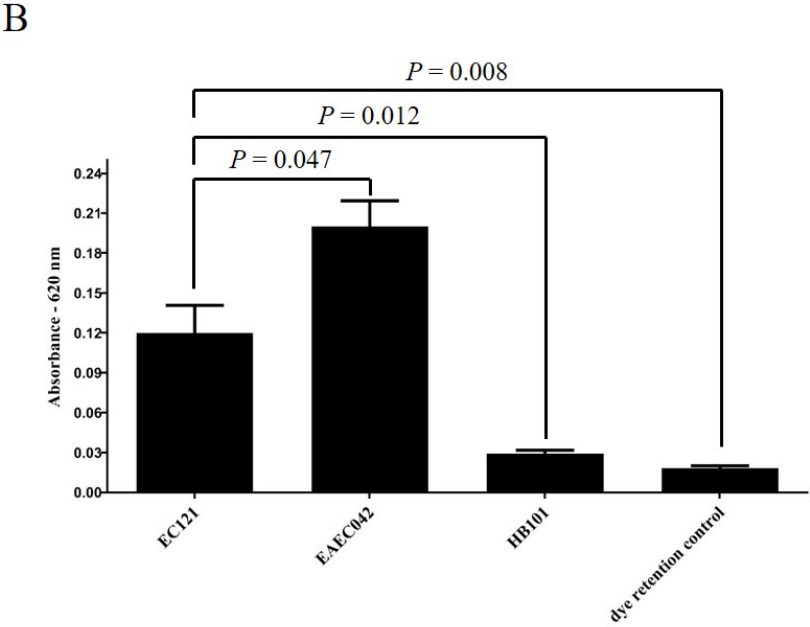

1055 Fig 5.

[Research article]

1056 **Fig 6.**

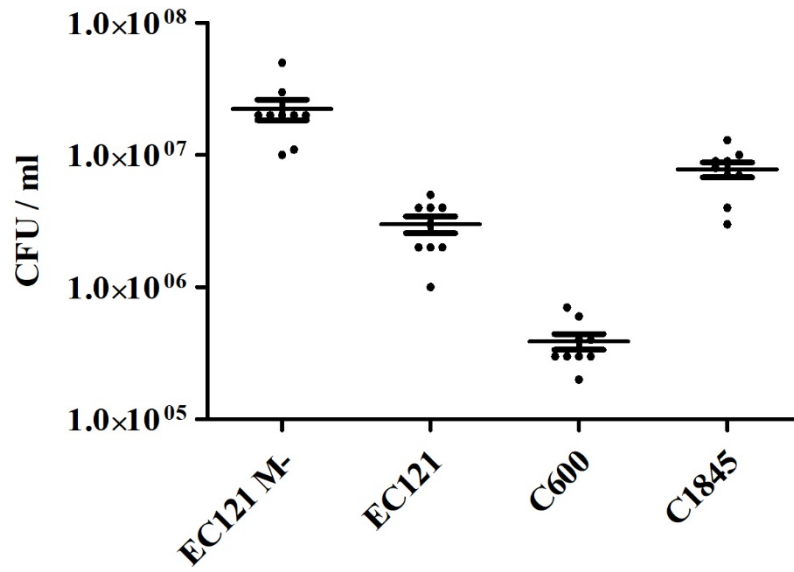

1057

1058

1059

1060

1061



1062

**Fig7.**

HeLa

Caco-2

T24

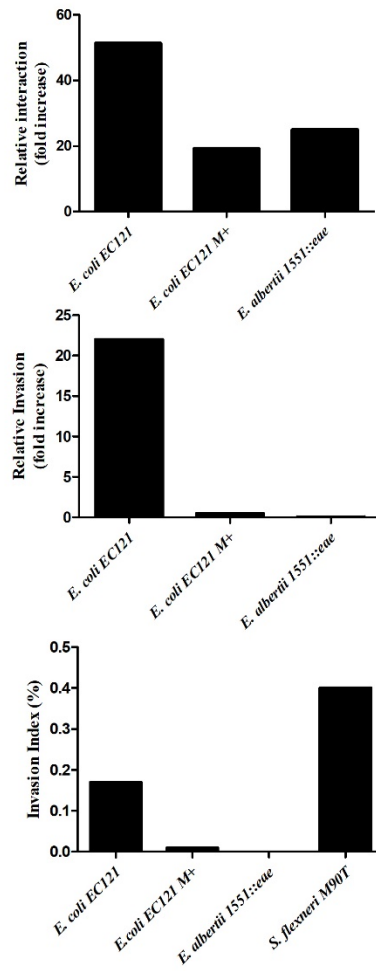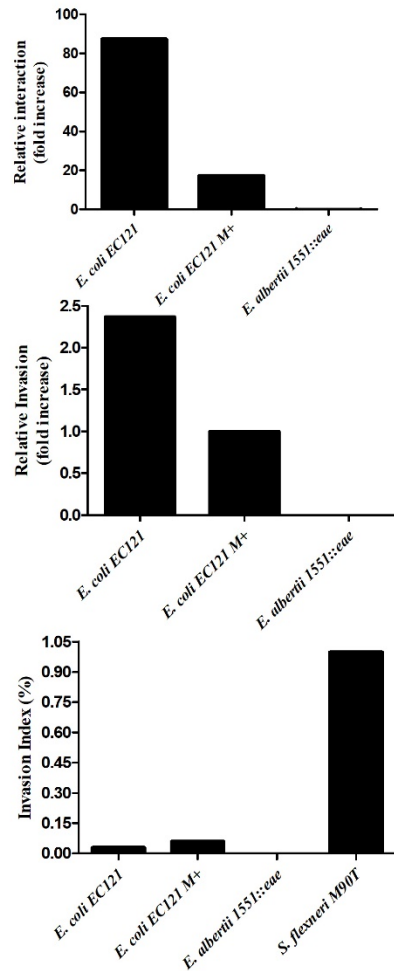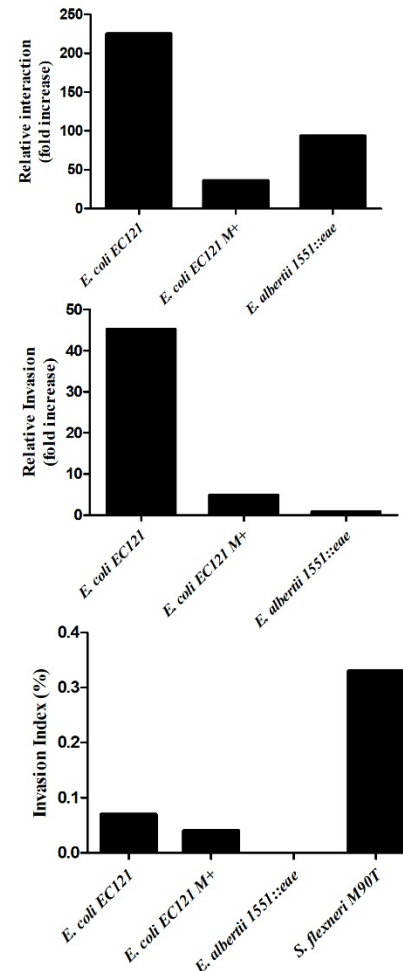

1063
